# Supplementary material for: Encapsulating an iron complex in a heme and anthraquinone codecorated capsule for multiphoton C(sp3)−H bond oxygenation
Source: Research Square preprint supplement (doi:10.21203/rs.3.rs-6746655/v1), 2025-06-06

## checkCIF/PLATON report

You have not supplied any structure factors. As a result the full set of tests cannot be run.

THIS REPORT IS FOR GUIDANCE ONLY. IF USED AS PART OF A REVIEW PROCEDURE FOR PUBLICATION, IT SHOULD NOT REPLACE THE EXPERTISE OF AN EXPERIENCED CRYSTALLOGRAPHIC REFEREE.

No syntax errors found. CIF dictionary Interpreting this report

## Datablock: 01

|                 |                |                    |             |  |
|-----------------|----------------|--------------------|-------------|--|
| Bond precision: | C-C = 0.0094 Å | Wavelength=1.54178 |             |  |
| Cell:           | a=18.0793(11)  | b=24.9505(17)      | c=14.994(1) |  |
|                 | alpha=90       | beta=90            | gamma=90    |  |
| Temperature:    | 302 K          |                    |             |  |

|                | Calculated        | Reported          |
|----------------|-------------------|-------------------|
| Volume         | 6763.6(8)         | 6763.6(8)         |
| Space group    | A b a 2           | A e a 2           |
| Hall group     | A 2 -2ac          | A 2 -2ac          |
| Moiety formula | C84 H52 Fe2 N12 O | C84 H52 Fe2 N12 O |
| Sum formula    | C84 H52 Fe2 N12 O | C84 H52 Fe2 N12 O |
| Mr             | 1357.08           | 1357.07           |
| Dx, g cm-3     | 1.333             | 1.333             |
| Z              | 4                 | 4                 |
| Mu (mm-1)      | 3.901             | 3.901             |
| F000           | 2800.0            | 2800.0            |
| F000'          | 2798.24           |                   |
| h, k, lmax     | 21, 30, 18        | 21, 30, 18        |
| Nref           | 6233[ 3250]       | 6105              |
| Tmin, Tmax     | 0.585, 0.602      | 0.643, 0.753      |
| Tmin'          | 0.530             |                   |

```
Correction method= # Reported T Limits: Tmin=0.643 Tmax=0.753
AbsCorr = NONE
```

Data completeness= 1.88/0.98                      Theta(max)= 68.573

```
R(reflections)= 0.0447( 4428)      wR2(reflections)=
S = 0.983                        0.1141( 6105)
Npar= 447
```

---

The following ALERTS were generated. Each ALERT has the format

**test-name\_ALERT\_alert-type\_alert-level.**

Click on the hyperlinks for more details of the test.

---

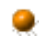

### Alert level B

PLAT987\_ALERT\_1\_B The Flack x is >> 0 - Do a BASF/TWIN Refinement Please Check

---

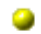

### Alert level C

|                   |                                                |         |           |
|-------------------|------------------------------------------------|---------|-----------|
| PLAT090_ALERT_3_C | Poor Data / Parameter Ratio (Zmax > 18) .....  | 7.27    | Note      |
| PLAT220_ALERT_2_C | NonSolvent Resd 1 C Ueq(max)/Ueq(min) Range    | 3.1     | Ratio     |
| PLAT234_ALERT_4_C | Large Hirshfeld Difference C23 --C24 .         | 0.16    | Ang.      |
| PLAT234_ALERT_4_C | Large Hirshfeld Difference C29 --C30 .         | 0.20    | Ang.      |
| PLAT241_ALERT_2_C | High 'MainMol' Ueq as Compared to Neighbors of |         | C23 Check |
| PLAT241_ALERT_2_C | High 'MainMol' Ueq as Compared to Neighbors of |         | C31 Check |
| PLAT242_ALERT_2_C | Low 'MainMol' Ueq as Compared to Neighbors of  |         | C21 Check |
| PLAT242_ALERT_2_C | Low 'MainMol' Ueq as Compared to Neighbors of  |         | C27 Check |
| PLAT242_ALERT_2_C | Low 'MainMol' Ueq as Compared to Neighbors of  |         | C30 Check |
| PLAT242_ALERT_2_C | Low 'MainMol' Ueq as Compared to Neighbors of  |         | C38 Check |
| PLAT331_ALERT_2_C | Small Aver Phenyl C-C Dist C27 --C32 .         | 1.37    | Ang.      |
| PLAT341_ALERT_3_C | Low Bond Precision on C-C Bonds .....          | 0.00936 | Ang.      |

---

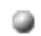

### Alert level G

PLAT794\_ALERT\_5\_G Tentative Bond Valency for Fe1 (III) . 2.95 Info

---

- 0 **ALERT level A** = Most likely a serious problem - resolve or explain  
1 **ALERT level B** = A potentially serious problem, consider carefully  
12 **ALERT level C** = Check. Ensure it is not caused by an omission or oversight  
1 **ALERT level G** = General information/check it is not something unexpected
- 1 ALERT type 1 CIF construction/syntax error, inconsistent or missing data  
8 ALERT type 2 Indicator that the structure model may be wrong or deficient  
2 ALERT type 3 Indicator that the structure quality may be low  
2 ALERT type 4 Improvement, methodology, query or suggestion  
1 ALERT type 5 Informative message, check
- 

## Validation response form

Please find below a validation response form (VRF) that can be filled in and pasted into your CIF.

```
# start Validation Reply Form
_vrf_PLAT987_01
;
PROBLEM: The Flack x is >> 0 - Do a BASF/TWIN Refinement Please Check
RESPONSE: ...
;
_vrf_PLAT090_01
;
PROBLEM: Poor Data / Parameter Ratio (Zmax > 18) ..... 7.27 Note
RESPONSE: ...
;
```

```

_vrf_PLAT220_01
;
PROBLEM: NonSolvent   Resd 1   C   Ueq(max)/Ueq(min) Range      3.1 Ratio
RESPONSE: ...
;
_vrf_PLAT234_01
;
PROBLEM: Large Hirshfeld Difference C23      --C24      .      0.16 Ang.
RESPONSE: ...
;
_vrf_PLAT241_01
;
PROBLEM: High   'MainMol' Ueq as Compared to Neighbors of      C23 Check
RESPONSE: ...
;
_vrf_PLAT242_01
;
PROBLEM: Low    'MainMol' Ueq as Compared to Neighbors of      C21 Check
RESPONSE: ...
;
_vrf_PLAT331_01
;
PROBLEM: Small Aver Phenyl C-C Dist C27      --C32      .      1.37 Ang.
RESPONSE: ...
;
_vrf_PLAT341_01
;
PROBLEM: Low Bond Precision on  C-C Bonds .....      0.00936 Ang.
RESPONSE: ...
;
# end Validation Reply Form

```

---

It is advisable to attempt to resolve as many as possible of the alerts in all categories. Often the minor alerts point to easily fixed oversights, errors and omissions in your CIF or refinement strategy, so attention to these fine details can be worthwhile. In order to resolve some of the more serious problems it may be necessary to carry out additional measurements or structure refinements. However, the purpose of your study may justify the reported deviations and the more serious of these should normally be commented upon in the discussion or experimental section of a paper or in the "special\_details" fields of the CIF. checkCIF was carefully designed to identify outliers and unusual parameters, but every test has its limitations and alerts that are not important in a particular case may appear. Conversely, the absence of alerts does not guarantee there are no aspects of the results needing attention. It is up to the individual to critically assess their own results and, if necessary, seek expert advice.

### **Publication of your CIF in IUCr journals**

A basic structural check has been run on your CIF. These basic checks will be run on all CIFs submitted for publication in IUCr journals (*Acta Crystallographica*, *Journal of Applied Crystallography*, *Journal of Synchrotron Radiation*); however, if you intend to submit to *Acta Crystallographica Section C* or *E* or *IUCrData*, you should make sure that full publication checks are run on the final version of your CIF prior to submission.

### **Publication of your CIF in other journals**

Please refer to the *Notes for Authors* of the relevant journal for any special instructions relating to CIF submission.

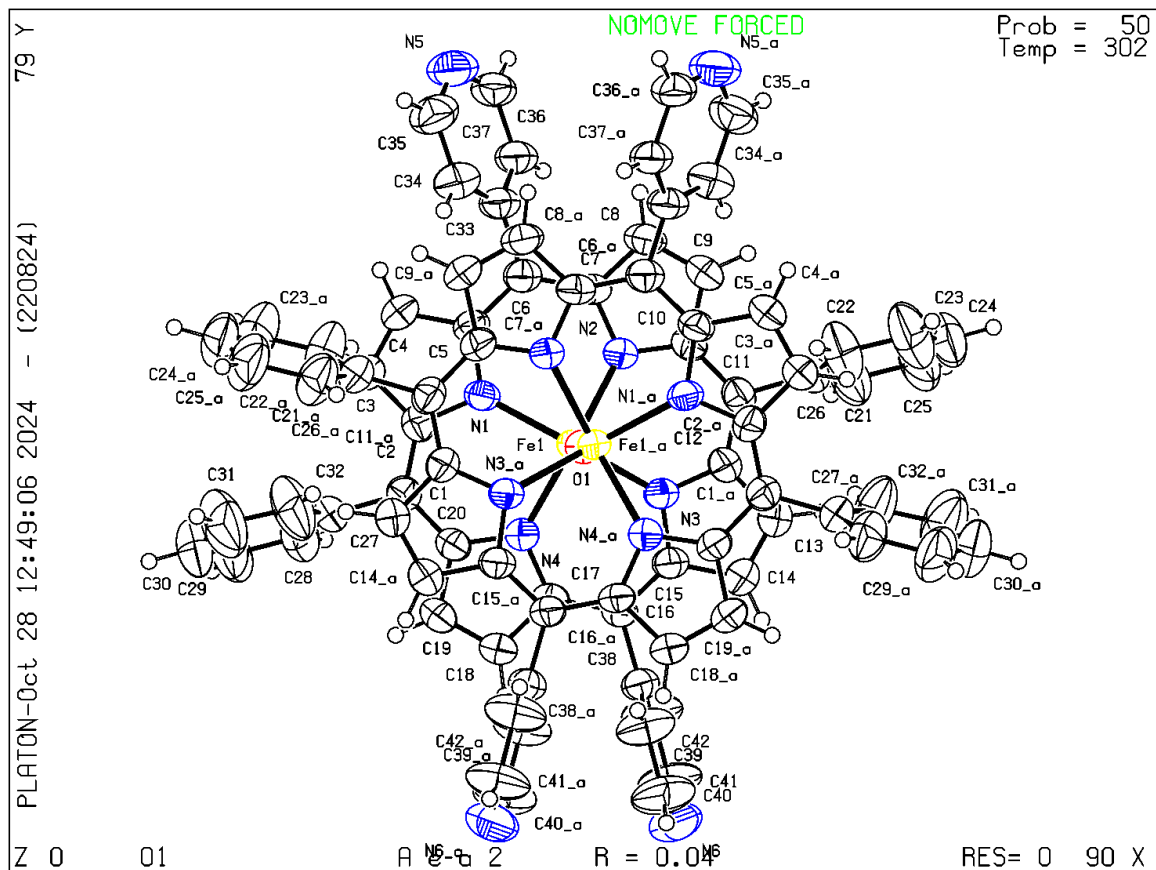

Supplement: Supplementary file 2 [file 3c077ec91ca4780f58c6344d.pdf]
