# Supplementary material for: Encapsulating an iron complex in a heme and anthraquinone codecorated capsule for multiphoton C(sp3)−H bond oxygenation
Source: Research Square preprint supplement (doi:10.21203/rs.3.rs-6746655/v1), 2025-06-06

## checkCIF/PLATON report

You have not supplied any structure factors. As a result the full set of tests cannot be run.

THIS REPORT IS FOR GUIDANCE ONLY. IF USED AS PART OF A REVIEW PROCEDURE FOR PUBLICATION, IT SHOULD NOT REPLACE THE EXPERTISE OF AN EXPERIENCED CRYSTALLOGRAPHIC REFEREE.

No syntax errors found.      CIF dictionary      Interpreting this report

### Datablock: 1

---

|                        |                                         |                                        |
|------------------------|-----------------------------------------|----------------------------------------|
| Bond precision:        | C-C = 0.0271 A                          | Wavelength=0.71073                     |
| Cell:                  | a=9.8798 (13)                           | b=14.6422 (19)      c=18.604 (2)       |
|                        | alpha=107.068 (3)                       | beta=97.771 (3)      gamma=102.798 (3) |
| Temperature:           | 193 K                                   |                                        |
|                        | Calculated                              | Reported                               |
| Volume                 | 2450.3 (5)                              | 2450.2 (6)                             |
| Space group            | P -1                                    | P -1                                   |
| Hall group             | -P 1                                    | -P 1                                   |
| Moiety formula         | C54 H36 Cl2 N4 O4 P2 Pt2 [+<br>solvent] | C54 H36 Cl2 N4 O4 P2 Pt2               |
| Sum formula            | C54 H36 Cl2 N4 O4 P2 Pt2 [+<br>solvent] | C54 H36 Cl2 N4 O4 P2 Pt2               |
| Mr                     | 1327.87                                 | 1327.89                                |
| Dx, g cm <sup>-3</sup> | 1.800                                   | 1.800                                  |
| Z                      | 2                                       | 2                                      |
| Mu (mm <sup>-1</sup> ) | 5.928                                   | 5.928                                  |
| F000                   | 1280.0                                  | 1280.0                                 |
| F000'                  | 1274.84                                 |                                        |
| h, k, lmax             | 11, 17, 22                              | 11, 17, 22                             |
| Nref                   | 8636                                    | 8627                                   |
| Tmin, Tmax             | 0.454, 0.491                            |                                        |
| Tmin'                  | 0.419                                   |                                        |

Correction method= Not given

Data completeness= 0.999      Theta(max)= 24.999

R(reflections)= 0.0834 ( 5292)

wR2(reflections)=  
0.2588 ( 8627)

S = 1.024

Npar= 613

---

The following ALERTS were generated. Each ALERT has the format

**test-name\_ALERT\_alert-type\_alert-level.**

Click on the hyperlinks for more details of the test.

---

### Alert level B

|                   |                                                  |       |   |              |
|-------------------|--------------------------------------------------|-------|---|--------------|
| PLAT234_ALERT_4_B | Large Hirshfeld Difference C46                   | --C47 | . | 0.26 Ang.    |
| PLAT342_ALERT_3_B | Low Bond Precision on C-C Bonds .....            |       |   | 0.02714 Ang. |
| PLAT990_ALERT_1_B | Deprecated .res/.hkl Input Style SQUEEZE Job ... |       |   | ! Note       |

---

### Alert level C

|                   |                                                  |                             |   |              |
|-------------------|--------------------------------------------------|-----------------------------|---|--------------|
| PLAT052_ALERT_1_C | Info on Absorption Correction Method             | Not Given                   |   | Please Do !  |
| PLAT084_ALERT_3_C | High wR2 Value (i.e. > 0.25) .....               |                             |   | 0.26 Report  |
| PLAT094_ALERT_2_C | Ratio of Maximum / Minimum Residual Density .... |                             |   | 3.83 Report  |
| PLAT213_ALERT_2_C | Atom C34                                         | has ADP max/min Ratio ..... |   | 3.2 prolat   |
| PLAT234_ALERT_4_C | Large Hirshfeld Difference C1                    | --C2                        | . | 0.16 Ang.    |
| PLAT234_ALERT_4_C | Large Hirshfeld Difference C5                    | --C6                        | . | 0.19 Ang.    |
| PLAT234_ALERT_4_C | Large Hirshfeld Difference C9                    | --C10                       | . | 0.18 Ang.    |
| PLAT234_ALERT_4_C | Large Hirshfeld Difference C14                   | --C15                       | . | 0.21 Ang.    |
| PLAT234_ALERT_4_C | Large Hirshfeld Difference C24                   | --C25                       | . | 0.17 Ang.    |
| PLAT234_ALERT_4_C | Large Hirshfeld Difference C53                   | --C54                       | . | 0.19 Ang.    |
| PLAT241_ALERT_2_C | High 'MainMol' Ueq as Compared to Neighbors of   |                             |   | C34 Check    |
| PLAT241_ALERT_2_C | High 'MainMol' Ueq as Compared to Neighbors of   |                             |   | C36 Check    |
| PLAT250_ALERT_2_C | Large U3/U1 Ratio for <U(i,j)> Tensor(Resd 1)    |                             |   | 2.4 Note     |
| PLAT767_ALERT_4_C | INS Embedded LIST 6 Instruction Should be LIST 4 |                             |   | Please Check |

---

### Alert level G

|                   |                                                  |           |   |              |
|-------------------|--------------------------------------------------|-----------|---|--------------|
| PLAT003_ALERT_2_G | Number of Uiso or U(i,j) Restrained non-H Atoms  |           |   | 62 Report    |
| PLAT072_ALERT_2_G | SHELXL First Parameter in WGHT Unusually Large   |           |   | 0.16 Report  |
| PLAT154_ALERT_1_G | The s.u.'s on the Cell Angles are Equal ..(Note) |           |   | 0.003 Degree |
| PLAT178_ALERT_4_G | The CIF-Embedded .res File Contains SIMU Records |           |   | 1 Report     |
| PLAT333_ALERT_2_G | Large Aver C6-Ring C-C Dist C23                  | -C27      | . | 1.46 Ang.    |
| PLAT335_ALERT_2_G | Check Large C6 Ring C-C Range C13                | -C18      |   | 0.19 Ang.    |
| PLAT432_ALERT_2_G | Short Inter X...Y Contact O3                     | ..C39     | . | 2.97 Ang.    |
|                   |                                                  | x,l+y,z = |   | 1_565 Check  |
| PLAT605_ALERT_4_G | Largest Solvent Accessible VOID in the Structure |           |   | 263 A**3     |
| PLAT860_ALERT_3_G | Number of Least-Squares Restraints .....         |           |   | 396 Note     |
| PLAT869_ALERT_4_G | ALERTS Related to the Use of SQUEEZE Suppressed  |           |   | ! Info       |
| PLAT933_ALERT_2_G | Number of HKL-OMIT Records in Embedded .res File |           |   | 2 Note       |
|                   | 2 -3 5, -3 13 3,                                 |           |   |              |
| PLAT941_ALERT_3_G | Average HKL Measurement Multiplicity .....       |           |   | 3.5 Low      |
| PLAT967_ALERT_5_G | Note: Two-Theta Cutoff Value in Embedded .res .. |           |   | 50.0 Degree  |

---

- 0 **ALERT level A** = Most likely a serious problem - resolve or explain  
3 **ALERT level B** = A potentially serious problem, consider carefully  
14 **ALERT level C** = Check. Ensure it is not caused by an omission or oversight  
13 **ALERT level G** = General information/check it is not something unexpected

3 ALERT type 1 CIF construction/syntax error, inconsistent or missing data

11 ALERT type 2 Indicator that the structure model may be wrong or deficient  
4 ALERT type 3 Indicator that the structure quality may be low  
11 ALERT type 4 Improvement, methodology, query or suggestion  
1 ALERT type 5 Informative message, check

---

---

It is advisable to attempt to resolve as many as possible of the alerts in all categories. Often the minor alerts point to easily fixed oversights, errors and omissions in your CIF or refinement strategy, so attention to these fine details can be worthwhile. In order to resolve some of the more serious problems it may be necessary to carry out additional measurements or structure refinements. However, the purpose of your study may justify the reported deviations and the more serious of these should normally be commented upon in the discussion or experimental section of a paper or in the "special\_details" fields of the CIF. checkCIF was carefully designed to identify outliers and unusual parameters, but every test has its limitations and alerts that are not important in a particular case may appear. Conversely, the absence of alerts does not guarantee there are no aspects of the results needing attention. It is up to the individual to critically assess their own results and, if necessary, seek expert advice.

### **Publication of your CIF in IUCr journals**

A basic structural check has been run on your CIF. These basic checks will be run on all CIFs submitted for publication in IUCr journals (*Acta Crystallographica*, *Journal of Applied Crystallography*, *Journal of Synchrotron Radiation*); however, if you intend to submit to *Acta Crystallographica Section C* or *E* or *IUCrData*, you should make sure that full publication checks are run on the final version of your CIF prior to submission.

### **Publication of your CIF in other journals**

Please refer to the *Notes for Authors* of the relevant journal for any special instructions relating to CIF submission.

---

**PLATON version of 22/08/2024; check.def file version of 21/08/2024**

Datablock 1 - ellipsoid plot

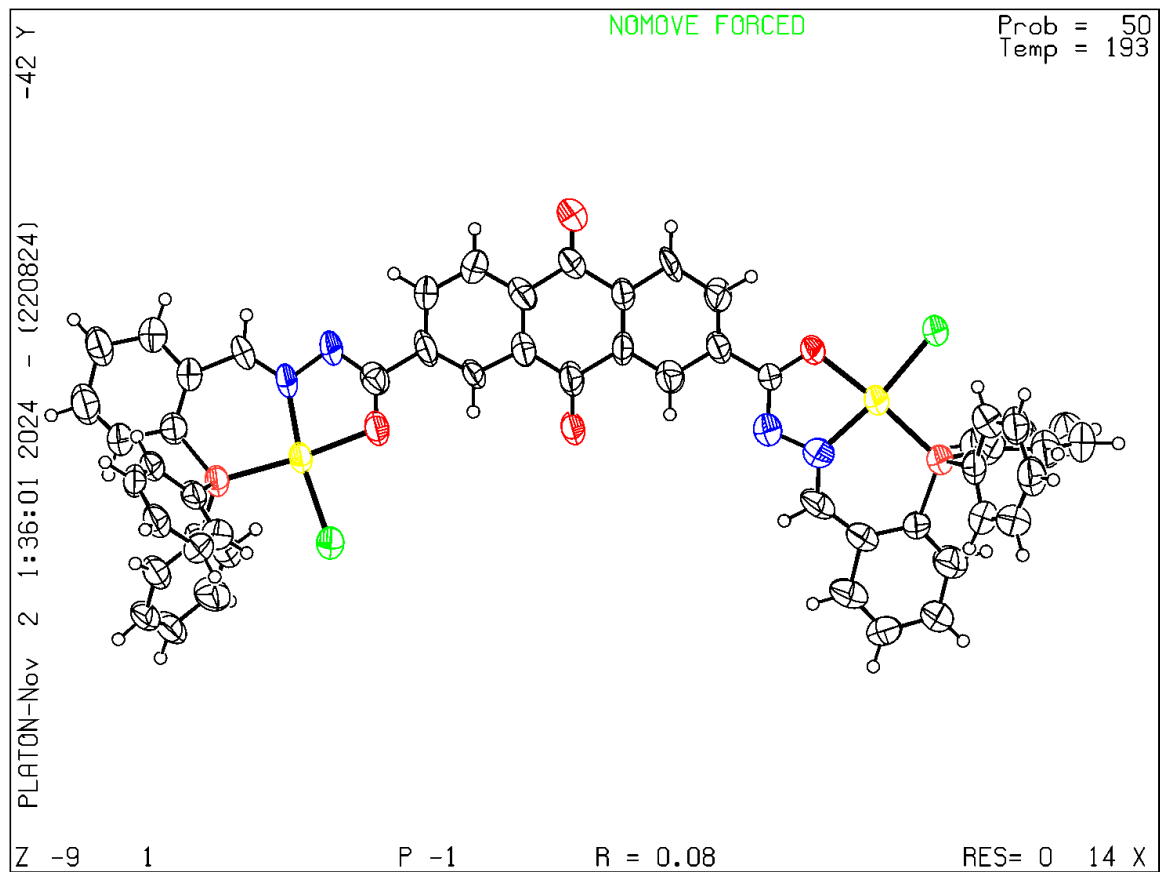

Supplement: Supplementary file 3 [file 8bd7a51af3ca97a5977b3cf9.pdf]
