# Supplementary material for: Encapsulating an iron complex in a heme and anthraquinone codecorated capsule for multiphoton C(sp3)−H bond oxygenation
Source: Research Square preprint supplement (doi:10.21203/rs.3.rs-6746655/v1), 2025-06-06

## checkCIF/PLATON report

You have not supplied any structure factors. As a result the full set of tests cannot be run.

THIS REPORT IS FOR GUIDANCE ONLY. IF USED AS PART OF A REVIEW PROCEDURE FOR PUBLICATION, IT SHOULD NOT REPLACE THE EXPERTISE OF AN EXPERIENCED CRYSTALLOGRAPHIC REFEREE.

No syntax errors found.      CIF dictionary      Interpreting this report

### Datablock: 321\_a

---

Bond precision:      C-C = 0.0058 Å

Wavelength=0.71073

Cell:                      a=8.8010 (4)                      b=11.4073 (6)                      c=11.5391 (4)  
                              alpha=94.090 (2)                      beta=107.393 (1)                      gamma=100.823 (2)  
Temperature:      193 K

|                        | Calculated                        | Reported                          |
|------------------------|-----------------------------------|-----------------------------------|
| Volume                 | 1075.76 (8)                       | 1075.76 (8)                       |
| Space group            | P -1                              | P -1                              |
| Hall group             | -P 1                              | -P 1                              |
| Moiety formula         | C14 H16 Cl2 Fe N6, 2 (C H4 O), Cl | C14 H16 Cl2 Fe N6, Cl, 2 (C H4 O) |
| Sum formula            | C16 H24 Cl3 Fe N6 O2              | C16 H24 Cl3 Fe N6 O2              |
| Mr                     | 494.61                            | 494.61                            |
| Dx, g cm <sup>-3</sup> | 1.527                             | 1.527                             |
| Z                      | 2                                 | 2                                 |
| Mu (mm <sup>-1</sup> ) | 1.098                             | 1.098                             |
| F000                   | 510.0                             | 510.0                             |
| F000'                  | 511.70                            |                                   |
| h,k,lmax               | 10,13,13                          | 10,13,13                          |
| Nref                   | 3797                              | 3780                              |
| Tmin,Tmax              | 0.858,0.877                       |                                   |
| Tmin'                  | 0.858                             |                                   |

Correction method= Not given

Data completeness= 0.996

Theta (max)= 24.995

R(reflections)= 0.0467 ( 3134)

wR2(reflections)=  
0.1284 ( 3780)

S = 1.096

Npar= 257

---

The following ALERTS were generated. Each ALERT has the format

**test-name\_ALERT\_alert-type\_alert-level.**

Click on the hyperlinks for more details of the test.

---

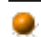

#### Alert level B

PLAT420\_ALERT\_2\_B D-H Bond Without Acceptor O00S --H00W . Please Check

---

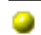

#### Alert level C

PLAT042\_ALERT\_1\_C Calc. and Reported MoietyFormula Strings Differ Please Check

Calc: C14 H16 Cl2 Fe N6, 2(C H4 O), Cl

Rep.: C14 H16 Cl2 Fe N6, Cl, 2(C H4 O)

PLAT052\_ALERT\_1\_C Info on Absorption Correction Method Not Given Please Do !

PLAT413\_ALERT\_2\_C Short Inter XH3 .. XHn H00E ..H00T . 2.12 Ang.

1-x,1-y,1-z = 2\_666 Check

PLAT413\_ALERT\_2\_C Short Inter XH3 .. XHn H00I ..H00V . 2.00 Ang.

x,-1+y,z = 1\_545 Check

PLAT413\_ALERT\_2\_C Short Inter XH3 .. XHn H00K ..H00V . 2.12 Ang.

x,-1+y,z = 1\_545 Check

---

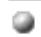

#### Alert level G

PLAT007\_ALERT\_5\_G Number of Unrefined Donor-H Atoms ..... 4 Report

H008 H00B H00J H00W

PLAT432\_ALERT\_2\_G Short Inter X...Y Contact Cl04 ..C000 . 3.15 Ang.

x,y,z = 1\_555 Check

PLAT720\_ALERT\_4\_G Number of Unusual/Non-Standard Labels ..... 52 Note

Fe01 Cl02 Cl03 Cl04 N005 N006 N007 N008

H008 N009 O00A H00J N00B H00B C00C C00D

C00E H00A H00C C00F H00D H00E C00G C00H

H00H C00I H00I C00J H00F H00G C00K H00K

C00L H00L C00M H00M C00N H00N C00O H00T

H00U H00V C00P H00P C00Q H00Q C00R H00O

H00R H00S O00S H00W

PLAT794\_ALERT\_5\_G Tentative Bond Valency for Fe01 (III) . 2.84 Info

PLAT941\_ALERT\_3\_G Average HKL Measurement Multiplicity ..... 2.2 Low

PLAT967\_ALERT\_5\_G Note: Two-Theta Cutoff Value in Embedded .res .. 50.0 Degree

---

- 0 **ALERT level A** = Most likely a serious problem - resolve or explain  
1 **ALERT level B** = A potentially serious problem, consider carefully  
5 **ALERT level C** = Check. Ensure it is not caused by an omission or oversight  
6 **ALERT level G** = General information/check it is not something unexpected

- 2 ALERT type 1 CIF construction/syntax error, inconsistent or missing data  
5 ALERT type 2 Indicator that the structure model may be wrong or deficient  
1 ALERT type 3 Indicator that the structure quality may be low  
1 ALERT type 4 Improvement, methodology, query or suggestion  
3 ALERT type 5 Informative message, check
- 
-

It is advisable to attempt to resolve as many as possible of the alerts in all categories. Often the minor alerts point to easily fixed oversights, errors and omissions in your CIF or refinement strategy, so attention to these fine details can be worthwhile. In order to resolve some of the more serious problems it may be necessary to carry out additional measurements or structure refinements. However, the purpose of your study may justify the reported deviations and the more serious of these should normally be commented upon in the discussion or experimental section of a paper or in the "special\_details" fields of the CIF. checkCIF was carefully designed to identify outliers and unusual parameters, but every test has its limitations and alerts that are not important in a particular case may appear. Conversely, the absence of alerts does not guarantee there are no aspects of the results needing attention. It is up to the individual to critically assess their own results and, if necessary, seek expert advice.

### **Publication of your CIF in IUCr journals**

A basic structural check has been run on your CIF. These basic checks will be run on all CIFs submitted for publication in IUCr journals (*Acta Crystallographica*, *Journal of Applied Crystallography*, *Journal of Synchrotron Radiation*); however, if you intend to submit to *Acta Crystallographica Section C* or *E* or *IUCrData*, you should make sure that full publication checks are run on the final version of your CIF prior to submission.

### **Publication of your CIF in other journals**

Please refer to the *Notes for Authors* of the relevant journal for any special instructions relating to CIF submission.

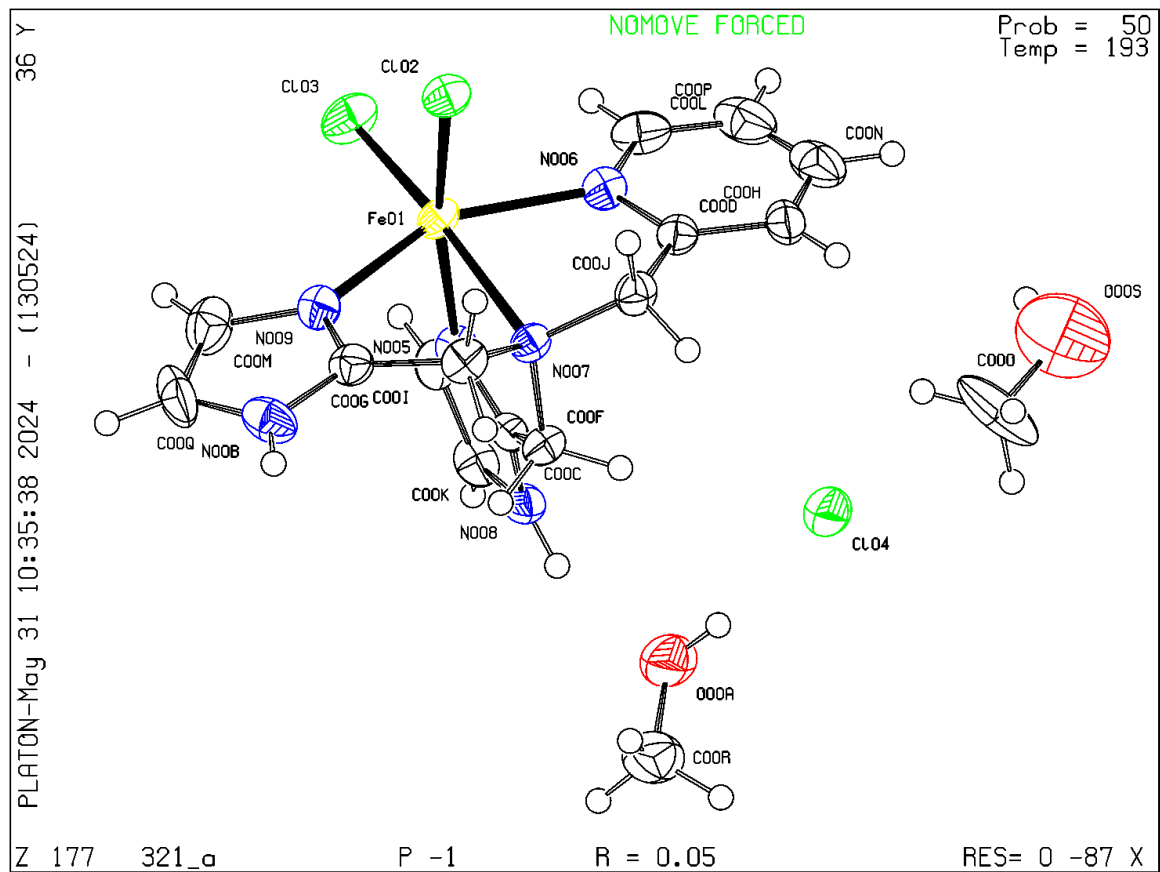

Supplement: Supplementary file 1 [file 252af38653947b3addeea4a2.pdf]
