# Supplementary material for: Encapsulating an iron complex in a heme and anthraquinone codecorated capsule for multiphoton C(sp3)−H bond oxygenation
Source: Research Square preprint supplement (doi:10.21203/rs.3.rs-6746655/v1), 2025-06-06

## checkCIF/PLATON report

You have not supplied any structure factors. As a result the full set of tests cannot be run.

THIS REPORT IS FOR GUIDANCE ONLY. IF USED AS PART OF A REVIEW PROCEDURE FOR PUBLICATION, IT SHOULD NOT REPLACE THE EXPERTISE OF AN EXPERIENCED CRYSTALLOGRAPHIC REFEREE.

No syntax errors found.      CIF dictionary      Interpreting this report

### Datablock: cu\_24jun19a\_0m\_a

---

|                 |                                                                         |                                                                          |
|-----------------|-------------------------------------------------------------------------|--------------------------------------------------------------------------|
| Bond precision: | C-C = 0.0223 A                                                          | Wavelength=1.54178                                                       |
| Cell:           | a=21.0539 (6)<br>alpha=90                                               | b=34.6467 (9)<br>beta=92.986 (2)<br>c=42.8754 (11)<br>gamma=90           |
| Temperature:    | 100 K                                                                   |                                                                          |
|                 | Calculated                                                              | Reported                                                                 |
| Volume          | 31232.9 (14)                                                            | 31232.9 (14)                                                             |
| Space group     | P 21/n                                                                  | P 1 21/n 1                                                               |
| Hall group      | -P 2yn                                                                  | -P 2yn                                                                   |
| Moiety formula  | C192 H125 Fe2 N20 O13 P5<br>Pt4, 2 (F6 P), C3 H6 N O,<br>2 (C3 H8 N O), | C192 H126 Fe2 N20 O14 P5<br>Pt4, 2 (F6 P), 2 (C3 H8 N O),<br>7 (H2 O), C |
| Sum formula     | C201 H162 F12 Fe2 N23 O24<br>P7 Pt4 [+ solvent]                         | C201 H162 F12 Fe2 N23 O24<br>P7 Pt4                                      |
| Mr              | 4620.36                                                                 | 4620.38                                                                  |
| Dx, g cm-3      | 0.983                                                                   | 0.983                                                                    |
| Z               | 4                                                                       | 4                                                                        |
| Mu (mm-1)       | 4.767                                                                   | 4.767                                                                    |
| F000            | 9192.0                                                                  | 9192.0                                                                   |
| F000'           | 9142.72                                                                 |                                                                          |
| h, k, lmax      | 25, 41, 51                                                              | 25, 41, 51                                                               |
| Nref            | 57437                                                                   | 54335                                                                    |
| Tmin, Tmax      | 0.539, 0.564                                                            | 0.503, 0.753                                                             |
| Tmin'           | 0.489                                                                   |                                                                          |

Correction method= # Reported T Limits: Tmin=0.503 Tmax=0.753  
AbsCorr = NONE

Data completeness= 0.946

Theta (max)= 68.437

R(reflections)= 0.0936( 23276)

wR2(reflections)=  
0.2715( 54335)

S = 0.883

Npar= 2458

---

The following ALERTS were generated. Each ALERT has the format

**test-name\_ALERT\_alert-type\_alert-level.**

Click on the hyperlinks for more details of the test.

---

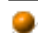

### Alert level B

|                   |                                                  |         |       |
|-------------------|--------------------------------------------------|---------|-------|
| PLAT029_ALERT_3_B | _diffn_measured_fraction_theta_full value Low .  | 0.952   | Why?  |
| PLAT260_ALERT_2_B | Large Average Ueq of Residue Including P502      | 0.360   | Check |
| PLAT260_ALERT_2_B | Large Average Ueq of Residue Including P503      | 0.334   | Check |
| PLAT260_ALERT_2_B | Large Average Ueq of Residue Including 0510      | 0.516   | Check |
| PLAT260_ALERT_2_B | Large Average Ueq of Residue Including 0513      | 0.368   | Check |
| PLAT260_ALERT_2_B | Large Average Ueq of Residue Including 0514      | 0.461   | Check |
| PLAT260_ALERT_2_B | Large Average Ueq of Residue Including 0515      | 0.337   | Check |
| PLAT260_ALERT_2_B | Large Average Ueq of Residue Including 0516      | 0.449   | Check |
| PLAT342_ALERT_3_B | Low Bond Precision on C-C Bonds .....            | 0.02225 | Ang.  |
| PLAT369_ALERT_2_B | Long C(sp2)-C(sp2) Bond C115 - C116 .            | 1.59    | Ang.  |
| PLAT420_ALERT_2_B | D-H Bond Without Acceptor 0515 --H51A .          | Please  | Check |
| PLAT420_ALERT_2_B | D-H Bond Without Acceptor 0515 --H51B .          | Please  | Check |
| PLAT420_ALERT_2_B | D-H Bond Without Acceptor 0512 --H51C .          | Please  | Check |
| PLAT420_ALERT_2_B | D-H Bond Without Acceptor 0512 --H51D .          | Please  | Check |
| PLAT420_ALERT_2_B | D-H Bond Without Acceptor 0511 --H51E .          | Please  | Check |
| PLAT420_ALERT_2_B | D-H Bond Without Acceptor 0513 --H51G .          | Please  | Check |
| PLAT420_ALERT_2_B | D-H Bond Without Acceptor 0513 --H51H .          | Please  | Check |
| PLAT420_ALERT_2_B | D-H Bond Without Acceptor 0516 --H51I .          | Please  | Check |
| PLAT420_ALERT_2_B | D-H Bond Without Acceptor 0516 --H51J .          | Please  | Check |
| PLAT420_ALERT_2_B | D-H Bond Without Acceptor 0514 --H51K .          | Please  | Check |
| PLAT420_ALERT_2_B | D-H Bond Without Acceptor 0514 --H51L .          | Please  | Check |
| PLAT420_ALERT_2_B | D-H Bond Without Acceptor 0510 --H51M .          | Please  | Check |
| PLAT420_ALERT_2_B | D-H Bond Without Acceptor 0510 --H51N .          | Please  | Check |
| PLAT420_ALERT_2_B | D-H Bond Without Acceptor 0505 --H505 .          | Please  | Check |
| PLAT420_ALERT_2_B | D-H Bond Without Acceptor 0506 --H506 .          | Please  | Check |
| PLAT990_ALERT_1_B | Deprecated .res/.hkl Input Style SQUEEZE Job ... | !       | Note  |

---

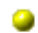

### Alert level C

|                   |                                                  |       |        |
|-------------------|--------------------------------------------------|-------|--------|
| RINTA01_ALERT_3_C | The value of Rint is greater than 0.12           |       |        |
|                   | Rint given 0.134                                 |       |        |
| PLAT020_ALERT_3_C | The Value of Rint is Greater Than 0.12 .....     | 0.134 | Report |
| PLAT026_ALERT_3_C | Ratio Observed / Unique Reflections (too) Low .. | 43%   | Check  |
| PLAT084_ALERT_3_C | High wR2 Value (i.e. > 0.25) .....               | 0.27  | Report |
| PLAT213_ALERT_2_C | Atom O103 has ADP max/min Ratio .....            | 3.1   | prolat |
| PLAT220_ALERT_2_C | NonSolvent Resd 1 C Ueq(max)/Ueq(min) Range      | 3.5   | Ratio  |
| PLAT220_ALERT_2_C | NonSolvent Resd 1 O Ueq(max)/Ueq(min) Range      | 3.2   | Ratio  |
| PLAT234_ALERT_4_C | Large Hirshfeld Difference P501 --O501 .         | 0.16  | Ang.   |
| PLAT234_ALERT_4_C | Large Hirshfeld Difference P501 --O504 .         | 0.19  | Ang.   |
| PLAT241_ALERT_2_C | High 'MainMol' Ueq as Compared to Neighbors of   | C104  | Check  |
| PLAT241_ALERT_2_C | High 'MainMol' Ueq as Compared to Neighbors of   | C105  | Check  |
| PLAT241_ALERT_2_C | High 'MainMol' Ueq as Compared to Neighbors of   | C117  | Check  |
| PLAT241_ALERT_2_C | High 'MainMol' Ueq as Compared to Neighbors of   | C211  | Check  |
| PLAT241_ALERT_2_C | High 'MainMol' Ueq as Compared to Neighbors of   | C217  | Check  |
| PLAT241_ALERT_2_C | High 'MainMol' Ueq as Compared to Neighbors of   | C223  | Check  |

|                   |        |                                              |                      |                             |        |       |
|-------------------|--------|----------------------------------------------|----------------------|-----------------------------|--------|-------|
| PLAT241_ALERT_2_C | High   | 'MainMol'                                    | Ueq                  | as Compared to Neighbors of | C227   | Check |
| PLAT241_ALERT_2_C | High   | 'MainMol'                                    | Ueq                  | as Compared to Neighbors of | C308   | Check |
| PLAT241_ALERT_2_C | High   | 'MainMol'                                    | Ueq                  | as Compared to Neighbors of | C324   | Check |
| PLAT241_ALERT_2_C | High   | 'MainMol'                                    | Ueq                  | as Compared to Neighbors of | C339   | Check |
| PLAT241_ALERT_2_C | High   | 'MainMol'                                    | Ueq                  | as Compared to Neighbors of | C340   | Check |
| PLAT241_ALERT_2_C | High   | 'MainMol'                                    | Ueq                  | as Compared to Neighbors of | C341   | Check |
| PLAT241_ALERT_2_C | High   | 'MainMol'                                    | Ueq                  | as Compared to Neighbors of | C342   | Check |
| PLAT241_ALERT_2_C | High   | 'MainMol'                                    | Ueq                  | as Compared to Neighbors of | C419   | Check |
| PLAT241_ALERT_2_C | High   | 'MainMol'                                    | Ueq                  | as Compared to Neighbors of | C424   | Check |
| PLAT241_ALERT_2_C | High   | 'MainMol'                                    | Ueq                  | as Compared to Neighbors of | C440   | Check |
| PLAT241_ALERT_2_C | High   | 'MainMol'                                    | Ueq                  | as Compared to Neighbors of | C442   | Check |
| PLAT242_ALERT_2_C | Low    | 'MainMol'                                    | Ueq                  | as Compared to Neighbors of | Fe41   | Check |
| PLAT242_ALERT_2_C | Low    | 'MainMol'                                    | Ueq                  | as Compared to Neighbors of | P101   | Check |
| PLAT242_ALERT_2_C | Low    | 'MainMol'                                    | Ueq                  | as Compared to Neighbors of | N306   | Check |
| PLAT242_ALERT_2_C | Low    | 'MainMol'                                    | Ueq                  | as Compared to Neighbors of | N406   | Check |
| PLAT242_ALERT_2_C | Low    | 'MainMol'                                    | Ueq                  | as Compared to Neighbors of | C109   | Check |
| PLAT242_ALERT_2_C | Low    | 'MainMol'                                    | Ueq                  | as Compared to Neighbors of | C133   | Check |
| PLAT242_ALERT_2_C | Low    | 'MainMol'                                    | Ueq                  | as Compared to Neighbors of | C307   | Check |
| PLAT242_ALERT_2_C | Low    | 'MainMol'                                    | Ueq                  | as Compared to Neighbors of | C327   | Check |
| PLAT242_ALERT_2_C | Low    | 'MainMol'                                    | Ueq                  | as Compared to Neighbors of | C338   | Check |
| PLAT243_ALERT_4_C | High   | 'Solvent'                                    | Ueq                  | as Compared to Neighbors of | C503   | Check |
| PLAT244_ALERT_4_C | Low    | 'Solvent'                                    | Ueq                  | as Compared to Neighbors of | N501   | Check |
| PLAT244_ALERT_4_C | Low    | 'Solvent'                                    | Ueq                  | as Compared to Neighbors of | C506   | Check |
| PLAT244_ALERT_4_C | Low    | 'Solvent'                                    | Ueq                  | as Compared to Neighbors of | N502   | Check |
| PLAT244_ALERT_4_C | Low    | 'Solvent'                                    | Ueq                  | as Compared to Neighbors of | N503   | Check |
| PLAT250_ALERT_2_C | Large  | U3/U1 Ratio for <U(i,j)> Tensor(Resd         | 2)                   |                             | 2.3    | Note  |
| PLAT250_ALERT_2_C | Large  | U3/U1 Ratio for <U(i,j)> Tensor(Resd         | 3)                   |                             | 3.3    | Note  |
| PLAT260_ALERT_2_C | Large  | Average Ueq of Residue Including             | Pt1                  |                             | 0.104  | Check |
| PLAT260_ALERT_2_C | Large  | Average Ueq of Residue Including             | O507                 |                             | 0.268  | Check |
| PLAT260_ALERT_2_C | Large  | Average Ueq of Residue Including             | O508                 |                             | 0.270  | Check |
| PLAT260_ALERT_2_C | Large  | Average Ueq of Residue Including             | O509                 |                             | 0.201  | Check |
| PLAT260_ALERT_2_C | Large  | Average Ueq of Residue Including             | O505                 |                             | 0.187  | Check |
| PLAT260_ALERT_2_C | Large  | Average Ueq of Residue Including             | O511                 |                             | 0.253  | Check |
| PLAT260_ALERT_2_C | Large  | Average Ueq of Residue Including             | O512                 |                             | 0.211  | Check |
| PLAT309_ALERT_2_C | Single | Bonded Oxygen (C-O > 1.3 Ang)                | .....                |                             | O507   | Check |
| PLAT309_ALERT_2_C | Single | Bonded Oxygen (C-O > 1.3 Ang)                | .....                |                             | O508   | Check |
| PLAT309_ALERT_2_C | Single | Bonded Oxygen (C-O > 1.3 Ang)                | .....                |                             | O509   | Check |
| PLAT369_ALERT_2_C | Long   | C(sp2)-C(sp2) Bond                           | C301 - C321          | .                           | 1.53   | Ang.  |
| PLAT369_ALERT_2_C | Long   | C(sp2)-C(sp2) Bond                           | C309 - C310          | .                           | 1.54   | Ang.  |
| PLAT369_ALERT_2_C | Long   | C(sp2)-C(sp2) Bond                           | C311 - C327          | .                           | 1.54   | Ang.  |
| PLAT369_ALERT_2_C | Long   | C(sp2)-C(sp2) Bond                           | C406 - C438          | .                           | 1.53   | Ang.  |
| PLAT369_ALERT_2_C | Long   | C(sp2)-C(sp2) Bond                           | C411 - C427          | .                           | 1.53   | Ang.  |
| PLAT415_ALERT_2_C | Short  | Inter D-H..H-X                               | H51C ..H244          | .                           | 2.11   | Ang.  |
|                   |        |                                              | x,y,z =              | 1_555                       | Check  |       |
| PLAT415_ALERT_2_C | Short  | Inter D-H..H-X                               | H51D ..H323          | .                           | 2.04   | Ang.  |
|                   |        |                                              | x,y,z =              | 1_555                       | Check  |       |
| PLAT415_ALERT_2_C | Short  | Inter D-H..H-X                               | H51I ..H236          | .                           | 2.01   | Ang.  |
|                   |        |                                              | -1/2+x,3/2-y,1/2+z = | 4_576                       | Check  |       |
| PLAT767_ALERT_4_C | INS    | Embedded LIST 6 Instruction Should be LIST 4 |                      |                             | Please | Check |

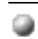

### Alert level G

|                   |                                                        |     |        |
|-------------------|--------------------------------------------------------|-----|--------|
| PLAT002_ALERT_2_G | Number of Distance or Angle Restraints on AtSite       | 27  | Note   |
| PLAT003_ALERT_2_G | Number of Uiso or U(i,j) Restrained non-H Atoms        | 273 | Report |
| PLAT007_ALERT_5_G | Number of Unrefined Donor-H Atoms .....                | 16  | Report |
|                   | H506 H505 H51M H51N H51E H51F H51C H51D H51G H51H H51K |     |        |
|                   | H51L H51A H51B H51I H51J                               |     |        |

PLAT042\_ALERT\_1\_G Calc. and Reported MoietyFormula Strings Differ Please Check  
 Calc: C192 H125 Fe2 N20 O13 P5 Pt4, 2(F6 P), C3 H6 N O, 2(C3 H8 N  
 Rep.: C192 H126 Fe2 N20 O14 P5 Pt4, 2(F6 P), 2(C3 H8  
 N O), 7(H2 O), C3 H6 N O

PLAT072\_ALERT\_2\_G SHELXL First Parameter in WGHT Unusually Large 0.15 Report

PLAT172\_ALERT\_4\_G The CIF-Embedded .res File Contains DFIX Records 14 Report

PLAT173\_ALERT\_4\_G The CIF-Embedded .res File Contains DANG Records 2 Report

PLAT176\_ALERT\_4\_G The CIF-Embedded .res File Contains SADI Records 3 Report

PLAT177\_ALERT\_4\_G The CIF-Embedded .res File Contains DELU Records 1 Report

PLAT178\_ALERT\_4\_G The CIF-Embedded .res File Contains SIMU Records 1 Report

PLAT186\_ALERT\_4\_G The CIF-Embedded .res File Contains ISOR Records 1 Report

PLAT192\_ALERT\_3\_G A Non-default DELU Restraint Value for SecondPar 0.0200 Report

PLAT244\_ALERT\_4\_G Low 'Solvent' Ueq as Compared to Neighbors of P502 Check

PLAT244\_ALERT\_4\_G Low 'Solvent' Ueq as Compared to Neighbors of P503 Check

PLAT344\_ALERT\_2\_G Unusual sp? Angle Range in Solvent/Ion for C506 Check

PLAT380\_ALERT\_4\_G Incorrectly? Oriented X(sp2)-Methyl Moiety ..... C504 Check

PLAT380\_ALERT\_4\_G Incorrectly? Oriented X(sp2)-Methyl Moiety ..... C505 Check

PLAT380\_ALERT\_4\_G Incorrectly? Oriented X(sp2)-Methyl Moiety ..... C507 Check

PLAT380\_ALERT\_4\_G Incorrectly? Oriented X(sp2)-Methyl Moiety ..... C508 Check

PLAT380\_ALERT\_4\_G Incorrectly? Oriented X(sp2)-Methyl Moiety ..... C501 Check

PLAT380\_ALERT\_4\_G Incorrectly? Oriented X(sp2)-Methyl Moiety ..... C502 Check

PLAT606\_ALERT\_4\_G Solvent Accessible VOID(S) in Structure ..... ! Info

PLAT794\_ALERT\_5\_G Tentative Bond Valency for Fe31 (III) . 2.86 Info

PLAT794\_ALERT\_5\_G Tentative Bond Valency for Fe41 (III) . 3.04 Info

PLAT860\_ALERT\_3\_G Number of Least-Squares Restraints ..... 2582 Note

PLAT869\_ALERT\_4\_G ALERTS Related to the Use of SQUEEZE Suppressed ! Info

PLAT933\_ALERT\_2\_G Number of HKL-OMIT Records in Embedded .res File 12 Note

-1 4 3, 1 1 3, -2 1 10, 3 2 2, 1 5 0, 1 2 1,  
 -2 0 4, -1 5 3, -1 3 2, 5 0 1, 2 2 8, -2 2 3,

PLAT941\_ALERT\_3\_G Average HKL Measurement Multiplicity ..... 3.2 Low

---

0 **ALERT level A** = Most likely a serious problem - resolve or explain  
 26 **ALERT level B** = A potentially serious problem, consider carefully  
 61 **ALERT level C** = Check. Ensure it is not caused by an omission or oversight  
 28 **ALERT level G** = General information/check it is not something unexpected

2 ALERT type 1 CIF construction/syntax error, inconsistent or missing data  
 77 ALERT type 2 Indicator that the structure model may be wrong or deficient  
 9 ALERT type 3 Indicator that the structure quality may be low  
 24 ALERT type 4 Improvement, methodology, query or suggestion  
 3 ALERT type 5 Informative message, check

---

It is advisable to attempt to resolve as many as possible of the alerts in all categories. Often the minor alerts point to easily fixed oversights, errors and omissions in your CIF or refinement strategy, so attention to these fine details can be worthwhile. In order to resolve some of the more serious problems it may be necessary to carry out additional measurements or structure refinements. However, the purpose of your study may justify the reported deviations and the more serious of these should normally be commented upon in the discussion or experimental section of a paper or in the "special\_details" fields of the CIF. checkCIF was carefully designed to identify outliers and unusual parameters, but every test has its limitations and alerts that are not important in a particular case may appear. Conversely, the absence of alerts does not guarantee there are no aspects of the results needing attention. It is up to the individual to critically assess their own results and, if necessary, seek expert advice.

### **Publication of your CIF in IUCr journals**

A basic structural check has been run on your CIF. These basic checks will be run on all CIFs submitted for publication in IUCr journals (*Acta Crystallographica*, *Journal of Applied Crystallography*, *Journal of Synchrotron Radiation*); however, if you intend to submit to *Acta Crystallographica Section C* or *E* or *IUCrData*, you should make sure that full publication checks are run on the final version of your CIF prior to submission.

### **Publication of your CIF in other journals**

Please refer to the *Notes for Authors* of the relevant journal for any special instructions relating to CIF submission.

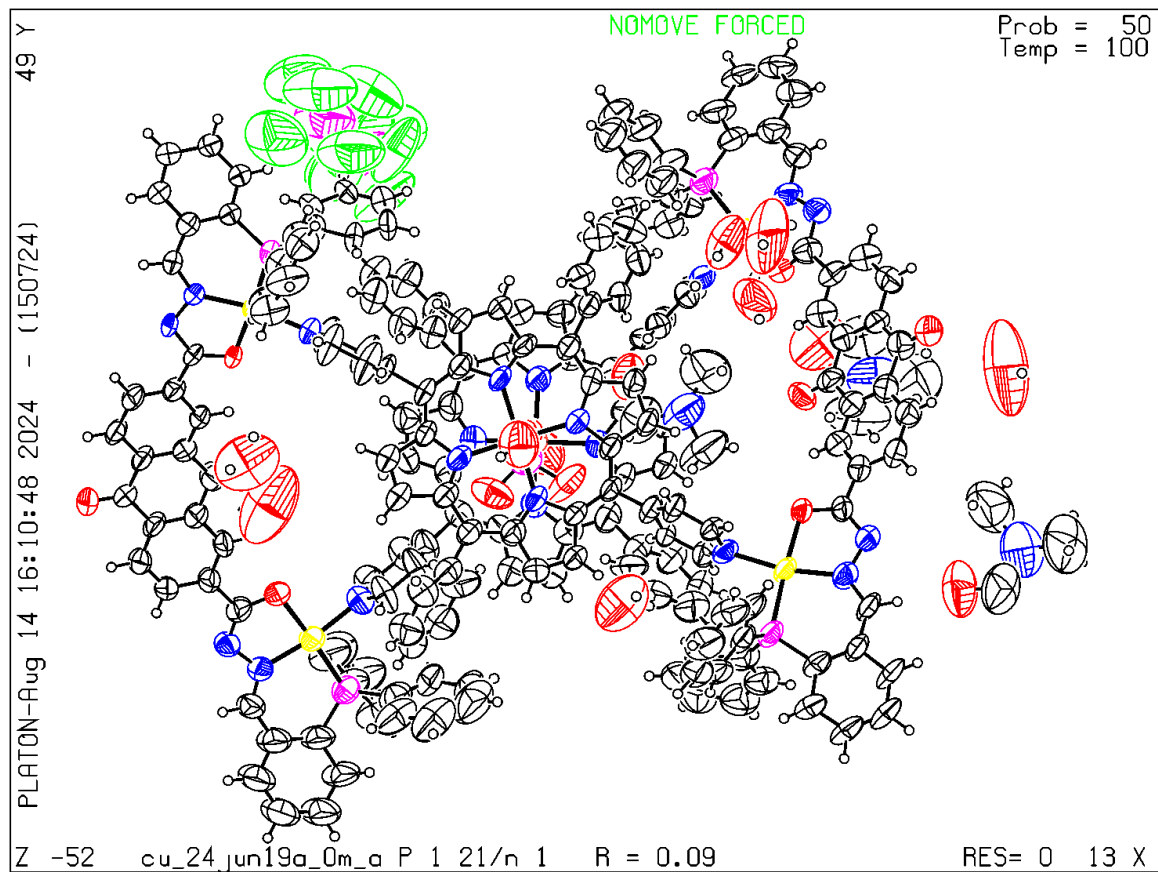

Supplement: Supplementary file 5 [file af76749bd1c53a5698f92257.pdf]
