# Supplementary material for: Encapsulating an iron complex in a heme and anthraquinone codecorated capsule for multiphoton C(sp3)−H bond oxygenation
Source: Research Square preprint supplement (doi:10.21203/rs.3.rs-6746655/v1), 2025-06-06
Supplement: Supplementary file 1 [file ebf729941f57809d7381874f.docx]

Supplementary Information for

**Encapsulating an iron complex in a heme and anthraquinone codecorated capsule for multiphoton C(*sp*3)−H bond oxygenation**

Lei Huang1, Junkai Cai*1, Qiaojia Guo1, Baotong Ding1, Mingxu Liu2, Chunming Ma2, and Chunying Duan1,2*

1State Key Laboratory of Coordination Chemistry, Nanjing University, Nanjing 210023, People’s Republic of China. 2State Key Laboratory of Fine Chemicals, Dalian University of Technology, Dalian 116024, People’s Republic of China.

*Corresponding Authors. Email: jkcai@nju.edu.cn; cyduan@dlut.edu.cn.

**Supplementary Methods**

**Experimental materials**

All chemicals and solvents were of reagent grade quality obtained from commercial sources and used without further purification. Methanol (99.5%), ethanol (99.7%), ethyl acetate (99.5%), chloroform (99.0%), toluene (99.5%), acetic acid (99.5%), petroleum ether (boiling range 60 to 90 ℃), sulfuric acid (95.0%) and hydrazine hydrate (99.9%) were supplied by Nanjing Chemical Reagent Co., Ltd. Dichloromethane (99.9%), *N*, *N*-dimethylformamide (DMF) (99.9%), acetonitrile (99.9%), triethylamine (99.5%), tetrahydrofuran (99.9%), *tert*-butyl methyl ether (99.0%), benzyl alcohol (99.9%), pyrrole (99.0%) and benzaldehyde (99.0%) were supplied by Energy Chemistry Co., Ltd. Hydrochloric acid (36%), aluminum chloride (99.0%), and propionic acid (99.5%) were supplied by Sinopharm Chemistry Reagent Co., Ltd. Chromium(VI) oxide (99.0%), acetic anhydride (98.5%), *tert*-butanol (99.5%) and silver nitrate (99.8%) were supplied by Shanghai Lingfeng Chemistry Reagent Co., Ltd. Neutral alumina was supplied by Shanghai Wusi Chemistry Reagent Co., Ltd. 2-Diphenylphosphinobenzaldehyde (98.9%), *O*-(6-chloro-1-hydrocibenzotriazol-1-yl)-1,1,3,3-tetra-methy-luronium-hexafluoro-phosphate (HCTU) (98.5%), 1,4-diaza-bicyclo[2,2,2]octane (DABCO) (99.8%), 4-pyridinecarboxaldehyde (99.9%) and 3,3’,5,5’-tetramethylbenzidine (TMB) (99.9%) were supplied by Bidepharm Co., Ltd. Potassium carbonate (99.0%) was supplied by Xilong Scientific Co., Ltd. Dipotassium tetrachloroplatinate (99.9%), imidazole-2-carboxaldehyde (98.0%) and 2-picolylamine (98.0%) were supplied by Heowns. 1,4-Benzoquinone (99.0%) was supplied by J&K Scientific Co., Ltd.

**Experimental method**

**Nuclear magnetic resonance (NMR).**

1H NMR, 19F NMR, and 31P NMR spectra were recorded on a Bruker AVANCE Ⅲ 400/600 MHz spectrometer. The peak frequencies were referenced versus an internal standard (tetramethylsilane, TMS) shift at 0.0 ppm. The diffusion ordered spectroscopy (DOSY) NMR spectra were recorded on a Bruker AVANCE Ⅲ 600 MHz spectrometer.

**Electron spray ionization-mass spectrometry (ESI-MS).**

The ESI-MS spectra were collected on Thermo Fisher Q Exactive mass spectrometer using acetonitrile as mobile phase. For the ESI-MS experiments of **HG** and **HG·1a**, a solution of **H1** (1.0 mM) in DMF/CH3CN (1:1) was prepared, followed by the addition of **GFe** (3.0 mM). The mixture was shaken for 2 min and filtered through a 0.22 μm organic filter membrane for ESI-MS analysis. Similarly, **1a** (20.0 mM) was added to a DMF/CH3CN (1:1) solution containing **H1** (1.0 mM) and **GFe** (1.0 mM). The mixture was shaken for 2 min and filtered through a 0.22 μm organic filter membrane for ESI-MS analysis.

**Fluorescence spectra.**

The solution fluorescence spectra were measured on a Horiba FL-3/Edinburgh FS-1000 fluorescence spectrophotometer at room temperature.

**Ultraviolet–visible spectroscopy (UV−vis) spectra.**

UV−vis spectra were measured on Shimadzu UV3600 spectrometer. All experiments were carried out using a 10.0 mm optical path cuvette.

**Gas chromatography-mass spectrometry (GC-MS).**

GC-MS analyses were performed on Agilent 8860 GC/MSD using an Agilent J&W HP-5MS UI column (30.0 m × 0.25 mm × 0.25 μm) with helium as carrier gas.

**Electron paramagnetic resonance (EPR) detection.**

The active oxygen species generated by **H1** or **HG** were detected by EPR experiments in the presence of 5,5-dimethyl-1-pyrroline *N*-oxide (DMPO) and 2,2,6,6-tetramethyl-piperidine (TEMP), respectively. Typically, DMPO (95.0 mM) or TEMP (60.0 mM) in 1.0 mL CH3CN/H2O (1:1, pH 9.4) solution was mixed with catalyst **H1** (0.5 mM) or **HG** (0.5 mM). The solution was irradiated with 395 nm LED for 3 min while stirring in the presence of O2 at room temperature. Subsequently, a portion of the mixture was transferred to an EPR tube. EPR spectra were measured on a Bruker EMX PLUS spectrometer. The sweep width was set at 150.0 Gauss, the center field was 3515 Gauss, and the temperature was 298 K. The measurement frequency was 9.9 GHz, with a field modulation of 100 kHz, a microwave power of 20.0 mW, a receiver gains of 30 dB, and a time constant of 0.01 ms.

**General procedure for photocatalytic 1a monooxygenation.**

Standard condition: Thioxanthene (**1a**, 16.0 mM) and catalyst (20.0 μM) were added into a 15 mL flask. Then 2.0 mL CH3CN/H2O (1:1, pH 9.4) solution was added to the flask under stirring condition. The reaction was carried out at room temperature upon 395 nm LED irradiation under O2 atmosphere. After adding 2.0 mL CHCl3, the mixture was shaken to extract the organic phase, and the conversion and selectivity were quantified by GC-MS analysis.

**Measurement of light intensity.**

The reaction tube was positioned at a fixed distance from the light source for each experiment. Light intensity was determined using a radiometer FZ-A supplied by Beijing Shida Photoelectric Technology Co., Ltd.

**TMB oxidation measurements.**

Typically, TMB (7.2 mg, 10.0 mM), **H1** (0.1 mM), and **GFe** (0.1 mM) were added into 3.0 mL HAc/NaAc (0.1 M) solution1. The reaction mixture solution was stirred under O2 atmosphere upon 395 nm light irradiation. The samples were taken at different time intervals for UV−vis measurements. To verify the specific active oxygen species, various scavengers, including *tert*-butanol (*t-*BuOH, 20.0 mM), 1,4-benzoquinone (BQ, 20.0 mM), and DABCO (20.0 mM) were added into the TMB solution before light irradiation.

**Preparation and Characterizations**

**Supplementary Scheme 1.** The synthetic route of iron complex **GFe**.

**Synthesis of the ligand LM**

The 1*H*-imidazole-2-carbaldehyde (4.04 g, 42.0 mmol) was added to a mixture of pyridin-2-ylmethanamine (2.27 g, 21.0 mmol) and sodium triacetoxyborohydride (STAB) (8.90 g, 42.0 mmol) stirring in dichloromethane (400 mL)2. The reaction mixture was stirred at room temperature for 18 h. Subsequently, a saturated aqueous solution of sodium bicarbonate was added, and the mixture was stirred for an additional 30 min. The product was extracted with ethyl acetate, then the solvent was removed under reduced pressure. The residue was purified *via* column chromatography on silica gel to give the desired products as a white solid. Yield: 21%. 1H NMR (400 MHz, DMSO-*d*6, ppm): *δ* 8.49 (d, *J* = 4.9 Hz, 1H), 7.81−7.73 (m, 1H), 7.60 (d, *J* = 7.8 Hz, 1H), 7.25 (dd, *J* = 7.4, 4.7 Hz, 1H), 7.00 (s, 4H), 3.67 (d, *J* = 7.2 Hz, 6H). ESI-MS calcd. for [M+H]+ 269.1510, found 269.1500.

**Synthesis of the complex GFe**

A solution of FeCl3**·**6H2O (0.54 g, 2.0 mmol) in acetonitrile (30 mL) was added to a solution of ligand **LM** (0.56 g, 2.1 mmol) in acetonitrile (30 mL), and the resulted mixture was stirred overnight. The volume of solution was reduced to approximately 40 mL to precipitate solid, which was isolated by filtration and washed twice with small quantities of acetonitrile. The obtained yellow powder was recrystallized by slow diffusion diethyl ether into its methanol solution and gave the product as yellow crystals, which were suitable for X-ray analysis. 1H NMR (600 MHz, DMSO-*d*6, ppm): *δ* 8.49 (s, 1H), 7.75 (s, 1H), 7.50 (d, *J* = 7.0 Hz, 1H), 7.44 (s, 4H), 7.27 (s, 1H), 7.19 (s, 1H), 6.65 (s, 1H), 4.11 (s, 4H), 3.82 (s, 2H). ESI-MS calcd. for [M−2Cl−H]+ 358.0391, found 358.0368.

**Supplementary Scheme 2.** The synthetic route of the compound **3**3.

**Synthesis of the compound 1**

The AlCl3 (22.7 g, 0.17 mol) was slowly added to dry toluene (100 mL) and benzyl alcohol (6.0 mL) in a 250 mL flask with ice bath. The mixture was refluxed at 110 °C for 3 h. After cooling to room temperature, the solution was quenched with H2O and concentrated HCl. The solid was obtained by filtration and washed with water, ethyl acetate and saturated NaHCO3. The resulting solid was dried under vacuum at 80 °C to yield compound **1**, as a yellow solid. Yield: 40%. 1H NMR (400 MHz, CDCl3, ppm): *δ* 2.53 (s, 6H), 7.26 (dd, 2H), 7.72 (s, 2H), 7.88 (d, 2H), 8.2 (s, 1H), 8.32 (s, 1H).

**Synthesis of the compound 2**

Cr2O3 (1.20 g, 12.0 mmol) dissolve in water (5.0 mL) was added to compound **1** (1.01 g, 4.9 mmol) in acetic acid (100 mL). The mixture was refluxed at 120 °C for 1 h. After cooling to room temperature, the solution was quenched with water. The solid was obtained by filtration, washed with water, and dried under vacuum at 80 °C to yield compound **2** as a white powder. Yield: 90%. 1H NMR (400 MHz, CDCl3, ppm): *δ* 8.19 (d, *J* = 7.9 Hz, 2H), 8.12−8.07 (m, 2H), 7.58 (ddd, *J* = 7.8, 1.9, 0.8 Hz, 2H), 2.53 (s, 6H).

**Synthesis of the** **compound 3**

Concentrated sulfuric acid (0.11 mL), acetic anhydride (0.68 mL), and acetic acid (16 mL) were added to a 50 mL round bottom flask and stirred. Then Cr2O3 (2.62 g, 26.2 mmol) was added to the flask. The mixture was cooled in an ice bath and then compound **2** (0.57 g, 2.4 mmol) was added slowly. After stirring for 2 h in ice bath, the mixture was refluxed at 120 °C for 3 h and cooled to room temperature. The solution was poured into cold H2O and the solid was obtained by filtration. The solid was dried under vacuum at 80 °C to yield compound **3** as a pale-yellow solid. Yield: 90%. 1H NMR (400 MHz, DMSO-*d6*, ppm): *δ* 13.8 (s, 2H), 8.74−8.73 (d, *J* = 1.5 Hz, 2H), 8.47−8.45 (dd, *J* = 8.0 Hz, 1.5 Hz, 2H), 8.38−8.36 (d, *J* = 8.0 Hz, 2H).

**Supplementary Scheme 3.** The synthetic route of the ligand H2**LQ**.

**Synthesis of the compound 4**

Compound **3** (0.56 g, 1.90 mmol), *O*-(6-chloro-1-hydrocibenzotriazol-1-yl)-1,1,3,3-tetramethyluroniumhexafluorophosphate (1.73 g, 4.18 mmol), triethylamine (1.0 mL), acetonitrile (5.0 mL) and chloroform (5.0 mL) were added to a round-bottomed flask equipped with a stir bar. The mixture was stirred for 1.5 h, followed by the addition of hydrazine hydrate (0.18 mL, 3.71 mmol) and triethylamine (1.0 mL). Stirring was continued for 19 h, after which the reaction mixture was filtered. The solid was suspended in saturated aqueous sodium bicarbonate, filtered, and washed with water to yield a solid product compound **4**. Yield: 30%. 1H NMR (400 MHz, DMSO-*d6*, ppm): *δ* 10.28 (s, 2H), 8.62 (d, *J* = 7.3 Hz, 2H), 8.29 (q, *J* = 8.3 Hz, 4H), 4.73 (s, 4H).

**Synthesis of the ligand H2LQ**

Compound **4** (0.16 g, 0.5 mmol) was added into an ethanol containing 2-diphenylphosphinobenzaldehyde (DPPBde) (0.29 g, 1.0 mmol) and a small amount of glacial acetic acid was introduced. The reaction mixture was then heated to 85 °C for 12 h. After reaction, the bright yellow solids were obtained by filtration. Yield: 72%. 1H NMR (400 MHz, DMSO-*d6*, ppm): *δ* 12.44 (s, 1H), 9.27 (d, *J* =5.2, 1H), 8.75−8.71 (m, 1H), 8.42 (d, *J* =7.8, 1H), 8.35 (d, *J* =8.0, 1H), 8.12 (dd, *J* =7.5, 4.1, 1H), 7.63−7.57 (m, 1H), 7.54 (t, *J* =7.5, 1H), 7.44 (d, *J* =4.3, 6H), 7.23 (dq, *J* =7.9, 2.8, 2.0, 4H), 6.88 (dd, *J* =7.6, 4.4, 1H).

**Supplementary Scheme 4.** The synthetic route of **LFe** ligand4.

**Synthesis of the compound 5**

Under argon atmosphere, concentrated HCl (1.0 mL, 37%) and pyrrole (5.2 mL, 75 mmol) were added to water (100 mL). The mixture was stirred until a clear solution formed, after which benzaldehyde (2.5 mL, 25.0 mmol) was added. The reaction mixture was then stirred at room temperature for 6 h. The solid was obtained by filtration and washed with water. The crude product was purified by column chromatography on silica gel with 50% petroleum ether/dichloromethane, a yellow solid compound **5** was obtained. Yield: 52%. 1H NMR (400 MHz, CDCl3, ppm): *δ* 7.95 (s, 2H), 7.37−7.24 (m, 5H), 6.72 (s, 2H), 6.20−6.18 (m, 2H), 5.95 (s, 2H), 5.51 (s, 1H).

**Synthesis of the ligand LH**

Compound **5** (0.98 g, 4.4 mmol) and 4-pyridinecarboxaldehyde (0.41 mL, 4.4 mmol) were dissolved in propionic acid (40 mL) in a 100 mL round bottom flask equipped with a stir bar and a water-cooled reflux condenser. The mixture was then allowed to reflux for 2 h under air. After cooling to room temperature, the reaction mixture was evaporated until dry using evaporator to yield a dark residue, which was dissolved in dichloromethane. The mixture was washed with saturated K2CO3 (0.1 M) and water (50 mL). Solvent evaporation allowed the formation of a black solid product. The resulted solid was purified by silica-gel column chromatography. After recrystallization from dichloromethane and methanol, a pure product was obtained as a purple solid. Yield: 82%. 1H NMR (400 MHz, CDCl3, ppm): *δ* 9.07−9.01 (m, 4H), 8.91 (d, *J* =4.8, 4H), 8.81 (d, *J* =4.8, 4H), 8.22−8.19 (m, 4H), 8.18−8.16 (m, 4H), 7.86−7.73 (m, 6H), −2.84 (s, 2H). ESI-MS calcd. for [**LH**+H]+ 617.2449, found 617.2435.

**Synthesis of the ligand LFe**

A solution of ligand **LH** (0.62 g, 1.0 mmol) and FeCl2∙4H2O (1.59 g, 8.0 mmol) in CHCl3 (70 mL) and CH3OH (30 mL). The mixture was heated to reflux for 12 h. After cooling down to room temperature, the CHCl3/CH3OH was removed under reduced pressure. The obtained solid was purified on a short-column chromatography. Yield: 70%. ESI-MS calcd. for [**LFe**−Cl]+ 670.1563, found 670.1561.

**Supplementary Scheme 5.** The synthetic route of the precursor Pt2**LQ**Cl2.

**Synthesis of the precursor Pt2LQCl2**

Ligand H2**LQ** (13.0 mg, 15.0 μmol) was introduced into CH3CN (3.0 mL) as a suspension. K2PtCl4 (12.4 mg, 30.0 μmol) in H2O (1.5 mL) was introduced to the mixture and stirred at 50 ℃ for 12 h. After reaction, the solution was extracted with CHCl3 three times. Evaporation of the organic solvent yielded a yellow solid, which was purified using a neutral alumina column with CHCl3 as mobile phase. After evaporation, a yellow solid product was obtained. Yield: 63%. 1H NMR (400 MHz, DMSO-*d6*, ppm): *δ* 9.31 (s, 1H), 8.94 (s, 1H), 8.57 (d, *J* = 7.6 Hz, 1H), 8.37 (d, *J* = 7.9 Hz, 1H), 8.22 (s, 1H), 7.89−7.76 (m, 2H), 7.73−7.55 (m, 10H), 7.19 (s, 1H). ESI-MS calcd. for [H2**LQ**+H]+ 1328.0959, found 1328.0906.

**Supplementary Scheme 6.** The synthetic route of the complex (**LFe**)2-O.

**Synthesis of the complex (LFe)2-O**

Ligand **LFe** (7.1 mg, 10.0 μmol) was dissolved in CH3CN (2.0 mL) and CH3OH (0.2 mL) mixture solution. Then, Et3N (14.0 µL) was added into the solution, and the mixture was stirred for 2 h at room temperature. After reaction, the solid was obtained by filtration and washed with acetonitrile, affording a dark brown product. Yield: 76%. ESI-MS calcd. for [(**LFe**)2-O**·**H]+ 1357.3159, found 1357.3152.

**Supplementary Scheme 7.** The synthetic route of the capsule **H1**.

**Synthesis of the capsule H1**

The precursor Pt2**LQ**Cl2 (16.5 mg, 12.4 μmol) was combined with AgNO3 (21.0 mg, 10.0 eq.) in DMF (3.0 mL). The mixture was stirred at 50 ℃ for 24 h in the dark. After reaction, the liquid was separated by filtration, and solvent evaporation allowed the formation of a yellow solid product. The produced yellow solid (15.6 mg, 10.0 μmol) and ligand **LFe** (7.1 mg, 10.0 μmol) were dissolved in DMF (2.0 mL) solution and stirred at 70 °C for 12 h. After reaction, solid product was precipitated upon the addition of ethyl ether. Subsequently, it was rinsed with a small quantity of ethanol and dried for a final dark green product **H1**. Yield: 39%. ESI-MS calcd. for [Pt4**LQ**2**LFe**2**·**O]4+ 967.6532, found 967.6506.

**Supplementary Scheme 8.** The synthetic route of the capsule **H2**.

**Synthesis of the capsule H2**

Capsule **H1** (41.2 mg, 10.0 μmol) was dissolved in DMF (10.0 mL), followed by the addition of NaPF6 (400 eq.). The reaction mixture was stirred for 1 h. The resulting solution was filtered to yield a filtrate, which was then added to diethyl ether. The precipitated solid was collected by filtration, washed with methanol and diethyl ether, and dried to afford a dark brown solid product. Yield: 66%. ESI-MS calcd. for [Pt4**LQ**2**LFe**2**·**PO4**·**H]4+ 987.8949, found 987.9009.

**Single Crystal X-ray Crystallography**

Crystallizations were performed in a constant temperature chamber maintained at 25 °C under dark condition. Ligand **LM** crystallized as colorless block-shaped crystals from a CH2Cl2/CH3CH2OH mixture (4:1, v/v) following solvent evaporation and subsequent cooling. Single crystals of complex **GFe**, in the form of bright yellow rods suitable for X-ray diffraction analysis, were obtained by vapor diffusion of diethyl ether into **GFe** (2.0 mM) in methanol for 2 weeks. Precursor Pt2**LQ**Cl2 formed yellow crystals *via* volatilization from a 2.0 mM Pt2**LQ**Cl2 solution in CHCl3. Single crystals of (**LFe**)2-O in dark red stick suitable for X-ray diffraction analysis were obtained by vapor diffusion of diethyl ether into CHCl3 over 1 week. Single crystals of **H2** in dark green stick suitable for X-ray diffraction analysis were obtained by vapor diffusion of *tert*-butyl methyl ether into DMF over 3 weeks.

Intensities of single crystals were collected on a Bruker SMART APEX CCD diffractometer equipped with graphite monochromated Cu-Kα (λ = 1.54178 Å) or Mo-Kα (λ = 0.71073 Å) using the SMART and SAINT programs5,6. The structure was solved by direct methods and refined on F2 by full-matrix least-squares methods with SHELXTL7. In the structural refinement of compound **LM**, **GFe**, Pt2**LQ**Cl2, and (**LFe**)2-O, all the non-hydrogen atoms were refined anisotropically. Hydrogen atoms within the ligand backbones and the solution molecules were fixed geometrically at calculated distances and allowed to ride on the parent non-hydrogen atoms. In the structural refinement of compound **H2**, all non-hydrogen atoms in the structure were refined anisotropically. Hydrogen atoms in the ligand backbone were placed at calculated geometric positions and were set to ride on their respective non-hydrogen atoms. To assist the stability of refinements, one oxygen atom coordinated with Fe metal core on the ligands, one PF6− anion and all DMF molecules were limited to the desired position with rational thermal parameters by several restrains. The thermal parameters on adjacent atoms were restrained to be similar. The squeeze instruction was further used to calculate and evaluate the possible numbers of the disordered solvent molecules for the date related to Pt2**LQ**Cl2 and **H2**8.


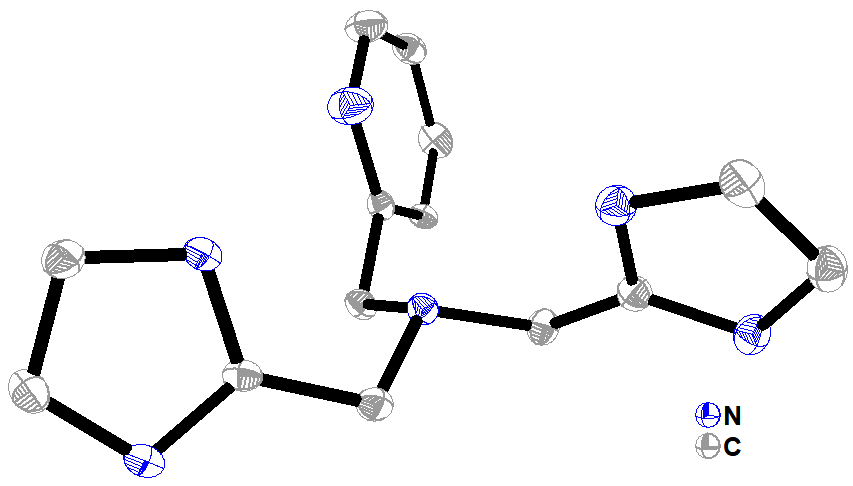


**Supplementary Figure 1.** The coordination configuration of the ligand **LM** showing 30% probability displacement ellipsoids of atoms. Hydrogen atoms and solvents were omitted for clarity. Symmetry code: 1x, y, z; 2-x, -y, z+1/2; 3x+1/2, -y+1/2, z; 4-x+1/2, y+1/2, z+1/2.

**Supplementary Table 1.** Crystallographic data and structure refinement for **LM**.

| Compound | Ligand **LM** |
| --- | --- |
| CCDC number | 2377726 |
| Empirical formula | C14H18N6O |
| Formula weight | 286.34 |
| Temperature/ K | 193 |
| Crystal system | orthorhombic |
| Space group | Pna21 |
| *a* / Å | 14.7146(3) |
| *b* / Å | 8.9906(2) |
| *c* / Å | 11.0612(2) |
| *α* /° | 90 |
| *β* /° | 90 |
| *γ* /° | 90 |
| Volume /Å3 | 1463.32(5) |
| Z | 4 |
| *ρ*cale g/cm3 | 1.3 |
| μ /mm-1 | 0.714 |
| F(000) | 608 |
| Crystal size/mm3 | 0.13 × 0.12 × 0.11 |
| Radiation | CuKα (λ = 1.54178) |
| 2θ range for data collection /° | 11.534 to 136.416 |
| Index ranges | -16 ≤ h ≤ 17, -10 ≤ k ≤ 10, -12 ≤ l ≤ 13 |
| Reflections collected | 9707 |
| Independent reflections | 2512 [Rint = 0.0475, Rsigma = 0.0427] |
| Data/restraints/parameters | 2512/1/190 |
| Goodness-of-fit on F2 | 1.145 |
| Final *R* indexes [I>=2σ(I)] | R1 = 0.0682, wR2 = 0.1721 |
| Final *R* indexes [all data] | R1 = 0.0683, wR2 = 0.1722 |
| Largest diff. peak/hole /eÅ-3 | 0.53/-0.50 |
| Flack parameter | 0.17(11) |

*R*1 = ∑׀׀*F*o׀−׀*F*c׀׀/∑׀*F*o׀. *wR*2 = [∑*w*(*F*o2−Fc2)2/∑*w*(*F*o2)2]1/2

**Supplementary Table 2.** Selected bond lengths [Å] for **LM**.

| Bond | Length/Å | Bond | Length/Å |
| --- | --- | --- | --- |
| N(3)-C(6) | 1.475(4) | C(4)-C(5) | 1.338(5) |
| N(3)-C(11) | 1.467(4) | C(4)-C(3) | 1.343(6) |
| N(3)-C(7) | 1.468(4) | C(9)-C(10) | 1.353(6) |
| N(2)-C(9) | 1.392(5) | C(12)-C(11) | 1.499(5) |
| N(2)-C(8) | 1.316(5) | C(5)-C(6) | 1.496(5) |
| N(5)-C(12) | 1.312(5) | C(5)-N(6) | 1.397(6) |
| N(5)-C(13) | 1.377(5) | C(13)-C(14) | 1.359(6) |
| N(1)-C(8) | 1.347(5) | C(8)-C(7) | 1.491(5) |
| N(1)-C(10) | 1.369(5) | C(2)-C(3) | 1.380(7) |
| N(4)-C(12) | 1.353(5) | C(2)-C(1) | 1.373(7) |
| N(4)-C(14) | 1.376(5) | N(6)-C(1) | 1.376(6) |

Symmetry code: 1x, y, z; 2-x, -y, z+1/2; 3x+1/2, -y+1/2, z; 4-x+1/2, y+1/2, z+1/2.

**Supplementary Table 3.** Selected bond angles [°] for **LM**.

| Bond | Bond Angles (°) | Bond | Bond Angles (°) |
| --- | --- | --- | --- |
| C(11)-N(3)-C(6) | 111.5(3) | N(6)-C(5)-C(6) | 120.9(3) |
| C(11)-N(3)-C(7) | 111.3(3) | N(3)-C(6)-C(5) | 111.4(3) |
| C(7)-N(3)-C(6) | 110.1(3) | N(3)-C(11)-C(12) | 111.7(3) |
| C(8)-N(2)-C(9) | 104.9(3) | C(14)-C(13)-N(5) | 110.2(3) |
| C(12)-N(5)-C(13) | 105.2(3) | N(2)-C(8)-N(1) | 111.7(3) |
| C(8)-N(1)-C(10) | 107.6(4) | N(2)-C(8)-C(7) | 124.0(3) |
| C(12)-N(4)-C(14) | 106.8(3) | N(1)-C(8)-C(7) | 124.2(3) |
| C(5)-C(4)-C(3) | 118.0(4) | C(1)-C(2)-C(3) | 118.6(4) |
| C(10)-C(9)-N(2) | 110.0(3) | N(3)-C(7)-C(8) | 112.7(3) |
| N(5)-C(12)-N(4) | 112.0(3) | C(9)-C(10)-N(1) | 105.9(4) |
| N(5)-C(12)-C(11) | 125.1(3) | C(4)-C(3)-C(2) | 123.0(4) |
| N(4)-C(12)-C(11) | 123.0(3) | C(13)-C(14)-N(4) | 105.8(3) |
| C(4)-C(5)-C(6) | 117.0(3) | C(1)-N(6)-C(5) | 118.7(4) |
| C(4)-C(5)-N(6) | 122.1(3) | C(2)-C(1)-N(6) | 119.5(4) |

Symmetry code: 1x, y, z; 2-x, -y, z+1/2; 3x+1/2, -y+1/2, z; 4-x+1/2, y+1/2, z+1/2.


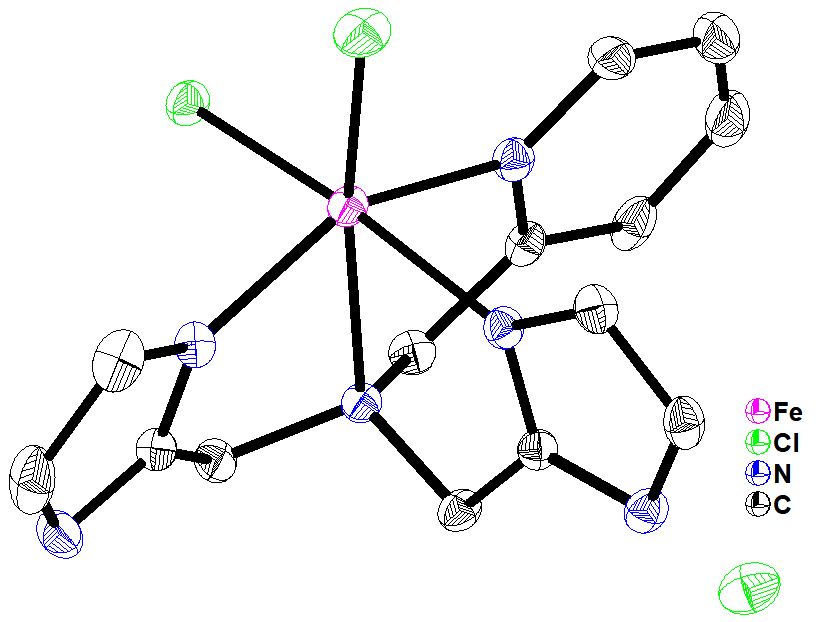


**Supplementary Figure 2.** The coordination configuration of the complex **GFe** showing 30% probability displacement ellipsoids of atoms. Hydrogen atoms, anions and solvents were omitted for clarity. Symmetry code: 1x, y, z; 2-x, -y, -z.

**Supplementary Table 4.** Crystallographic data and structure refinement for **GFe**.

| Compound | Complex **GFe** |
| --- | --- |
| CCDC number | 2292332 |
| Empirical formula | C16H24Cl3FeN6O2 |
| Formula weight | 494.61 |
| Temperature/ K | 193.0 |
| Crystal system | Triclinic |
| Space group | P-1 |
| *a* / Å | 8.8010(4) |
| *b* / Å | 11.4073(6) |
| *c* / Å | 11.5391(4) |
| *α* /° | 94.090(2) |
| *β* /° | 107.3930(10) |
| *γ* /° | 100.823(2) |
| Volume /Å3 | 1075.76(8) |
| Z | 2 |
| *ρ*cale g/cm3 | 1.527 |
| μ /mm-1 | 1.098 |
| F(000) | 510.0 |
| Crystal size/mm3 | 0.14 × 0.13 × 0.12 |
| Radiation | MoKα (λ = 0.71073) |
| 2θ range for data collection /° | 3.67 to 49.99 |
| Index ranges | -9 ≤ h ≤ 10, -13 ≤ k ≤ 10, -13 ≤ l ≤ 13 |
| Reflections collected | 8296 |
| Independent reflections | 3780 [Rint = 0.0349, Rsigma = 0.0448] |
| Data/restraints/parameters | 3780/0/257 |
| Goodness-of-fit on F2 | 1.096 |
| Final *R* indexes [I>=2σ(I)] | R1 = 0.0467, wR2 = 0.1204 |
| Final *R* indexes [all data] | R1 = 0.0588, wR2 = 0.1282 |
| Largest diff. peak/hole /eÅ-3 | 0.77/-0.79 |

*R*1 = ∑׀׀*F*o׀−׀*F*c׀׀/∑׀*F*o׀. *wR*2 = [∑*w*(*F*o2−Fc2)2/∑*w*(*F*o2)2]1/2

**Supplementary Table 5.** Selected bond lengths [Å] for **GFe**.

| Bond | Length/Å | Bond | Length/Å |
| --- | --- | --- | --- |
| Fe(1)-Cl((1)) | 2.2931(10) | N(5)-C(12) | 1.329(5) |
| Fe(1)-Cl(2) | 2.2367(10) | N(5)-C(14) | 1.391(5) |
| Fe(1)-N(4) | 2.110(3) | O(1)-C(15) | 1.413(5) |
| Fe(1)-N(1) | 2.148(3) | N(6)-C(12) | 1.345(5) |
| Fe(1)-N(2) | 2.308(3) | N(6)-C(13) | 1.395(6) |
| Fe(1)-N(5) | 2.095(3) | C(8)-C(7) | 1.490(5) |
| N(4)-C(8) | 1.326(4) | C(5)-C(4) | 1.379(5) |
| N(4)-C(10) | 1.380(4) | C(5)-C(6) | 1.503(5) |
| N(1)-C(5) | 1.341(5) | C(11)-C(12) | 1.486(5) |
| N(1)-C(1) | 1.344(5) | C(4)-C(3) | 1.336(6) |
| N(2)-C(11) | 1.486(4) | C(10)-C(9) | 1.360(5) |
| N(2)-C(7) | 1.498(4) | C(1)-C(2) | 1.328(6) |
| N(2)-C(6) | 1.483(4) | C(14)-C(13) | 1.391(7) |
| N(3)-C(8) | 1.337(4) | C(3)-C(2) | 1.317(7) |
| N(3)-C(9) | 1.390(5) | C(16)-O(2) | 1.380(7) |

Symmetry code: 1x, y, z; 2-x, -y, -z.

**Supplementary Table 6.** Selected bond angles [°] for **GFe**.

| Bond | Bond Angles (°) | Bond | Bond Angles (°) |
| --- | --- | --- | --- |
| Cl(1)-Fe(1)-N(2) | 90.90(7) | C(6)-N(2)-C(7) | 111.3(3) |
| Cl(2)-Fe(1)-Cl(1) | 98.79(4) | C(8)-N(3)-C(9) | 107.7(3) |
| Cl(2)-Fe(1)-N(2) | 170.30(8) | C(12)-N(5)-Fe(1) | 115.8(2) |
| N(4)-Fe(1)-Cl(1) | 168.06(9) | C(12)-N(5)-C(14) | 106.9(3) |
| N(4)-Fe(1)-Cl(2) | 92.56(8) | C(14)-N(5)-Fe(1) | 137.2(3) |
| N(4)-Fe(1)-N(1) | 84.16(11) | C(12)-N(6)-C(13) | 107.8(3) |
| N(4)-Fe(1)-N(2) | 77.74(11) | N(4)-C(8)-N(3) | 110.8(3) |
| N(1)-Fe(1)-Cl(1) | 89.43(8) | N(4)-C(8)-C(7) | 123.3(3) |
| N(1)-Fe(1)-Cl(2) | 104.36(8) | N(3)-C(8)-C(7) | 125.9(3) |
| N(1)-Fe(1)-N(2) | 75.12(11) | N(1)-C(5)-C(4) | 120.4(4) |
| N(5)-Fe(1)-Cl(1) | 92.23(9) | N(1)-C(5)-C(6) | 117.0(3) |
| N(5)-Fe(1)-Cl(2) | 104.77(9) | C(4)-C(5)-C(6) | 122.6(3) |
| N(5)-Fe(1)-N(4) | 88.41(11) | N(2)-C(11)-C(12) | 106.1(3) |
| N(5)-Fe(1)-N(1) | 150.21(12) | C(8)-C(7)-N(2) | 110.9(3) |
| N(5)-Fe(1)-N(2) | 75.11(11) | N(5)-C(12)-N(6) | 111.2(3) |
| C(8)-N(4)-Fe(1) | 116.7(2) | N(5)-C(12)-C(11) | 120.9(3) |
| C(8)-N(4)-C(10) | 106.5(3) | N(6)-C(12)-C(11) | 127.8(3) |
| C(10)-N(4)-Fe(1) | 136.5(2) | C(3)-C(4)-C(5) | 119.9(4) |
| C(5)-N(1)-Fe(1) | 117.5(2) | C(9)-C(10)-N(4) | 109.1(3) |
| C(5)-N(1)-C(1) | 117.3(3) | N(2)-C(6)-C(5) | 109.6(3) |
| C(1)-N(1)-Fe(1) | 125.1(3) | C(10)-C(9)-N(3) | 105.9(3) |
| C(11)-N(2)-Fe(1) | 105.9(2) | C(2)-C(1)-N(1) | 122.2(4) |
| C(11)-N(2)-C(7) | 110.4(3) | C(13)-C(14)-N(5) | 108.2(4) |
| C(7)-N(2)-Fe(1) | 110.5(2) | C(2)-C(3)-C(4) | 119.3(4) |
| C(6)N(2)Fe(1) | 106.27(19) | C(3)-C(2)-C(1) | 121.0(4) |
| C(6)-N(2)-C(11) | 112.2(3) | C(14)-C(13)-N(6) | 105.8(4) |

Symmetry code: 1x, y, z; 2-x, -y, -z.


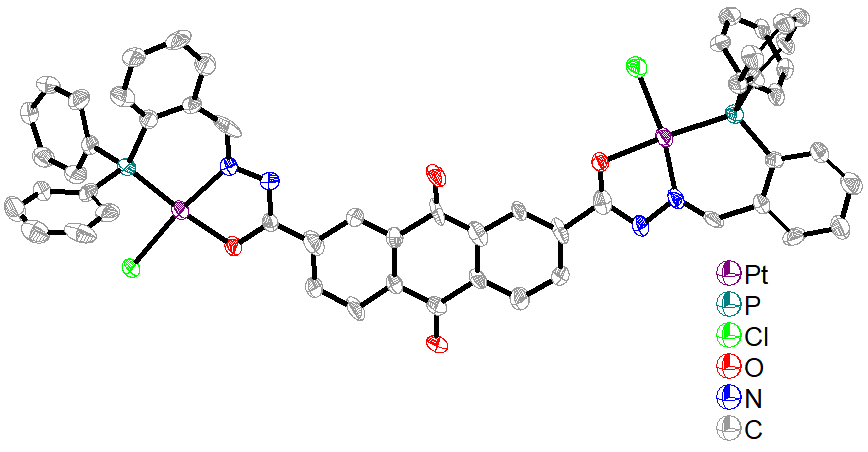


**Supplementary Figure 3.** The coordination configuration of the precursor Pt2**LQ**Cl2 showing 30% probability displacement ellipsoids of atoms. Hydrogen atoms were omitted for clarity. Symmetry code: 1x, y, z; 2-x, -y, -z.

**Supplementary Table 7.** Crystallographic data and structure refinement for Pt2**LQ**Cl2.

| Compound | Precursor Pt2**LQ**Cl2 |
| --- | --- |
| CCDC number | 2377725 |
| Empirical formula | C54H36Cl2N4O4P2Pt2 |
| Formula weight | 1327.89 |
| Temperature / K | 193 |
| Crystal system | triclinic |
| Space group | P-1 |
| *a* / Å | 9.8798(13) |
| *b* / Å | 14.6422(19) |
| *c* / Å | 18.604(2) |
| *α* /° | 107.068(3) |
| *β* /° | 97.771(3) |
| *γ* /° | 102.798(3) |
| Volume /Å3 | 2450.2(6) |
| Z | 2 |
| *ρ*cale g/cm3 | 1.8 |
| μ /mm-1 | 5.928 |
| F(000) | 1280 |
| Crystal size/mm3 | 0.14 × 0.13 × 0.12 |
| Radiation | MoKα (λ = 0.71073) |
| 2θ range for data collection /° | 4.328 to 49.998 |
| Index ranges | -11 ≤ h ≤ 11, -17 ≤ k ≤ 14, -22 ≤ l ≤ 22 |
| Reflections collected | 30271 |
| Independent reflections | 8627 [Rint = 0.0840, Rsigma = 0.0999] |
| Data/restraints/parameters | 8627/396/613 |
| Goodness-of-fit on F2 | 1.024 |
| Final *R* indexes [I>=2σ(I)] | R1 = 0.0834, wR2 = 0.2329 |
| Final *R* indexes [all data] | R1 = 0.1288, wR2 = 0.2588 |
| Largest diff. peak/hole /eÅ-3 | 3.81/-0.99 |

*R*1 = ∑׀׀*F*o׀−׀*F*c׀׀/∑׀*F*o׀. *wR*2 = [∑*w*(*F*o2−Fc2)2/∑*w*(*F*o2)2]1/2

**Supplementary Table 8.** Selected bond lengths [Å] for Pt2**LQ**Cl2.

| Bond | Length/Å | Bond | Length/Å |
| --- | --- | --- | --- |
| Pt(1)-P(1) | 2.189(4) | C(6)-C(5) | 1.36(2) |
| Pt(1)-Cl(1) | 2.287(5) | C(13)-C(18) | 1.41(2) |
| Pt(1)-O(1) | 2.055(10) | C(13)-C(14) | 1.39(2) |
| Pt(1)-N(1) | 1.982(14) | C(28)-C(29) | 1.36(2) |
| Pt(2)-Cl(2) | 2.293(4) | C(28)-C(27) | 1.49(2) |
| Pt(2)-P(2) | 2.188(5) | C(29)-C(30) | 1.50(2) |
| Pt(2)-O(4) | 2.046(10) | C(29)-C(34) | 1.415(1) |
| Pt(2)-N(4) | 1.972(13) | C(18)-C(17) | 1.39(2) |
| P(1)-C(1) | 1.824(17) | C(24)-C(30) | 1.47(2) |
| P(1) -C(13) | 1.821(17) | C(24)-C(25) | 1.40(2) |
| P(1)-C(7) | 1.804(14) | C(33)-C(34) | 1.43(2) |
| P(2) -C(49) | 1.84(2) | C(17)-C(16) | 1.40(2) |
| P(2) -C(43) | 1.79(2) | C(26)-C(25) | 1.38(2) |
| P(2) -C(42) | 1.802(15) | C(7)-C(12) | 1.418(1 |
| O(1)-C(20) | 1.25(2) | C(7)-C(8) | 1.37(2) |
| O(4)-C(35) | 1.268(16) | C(15)-C(16) | 1.49(3) |
| O(2)-C(27) | 1.25(2) | C(15)-C(14) | 1.30(3) |
| N(1)-N(2) | 1.392(15) | C(49)-C(50) | 1.40(2) |
| N(1)-C(19) | 1.32(2) | C(49)-C(54) | 1.36(3) |
| N(2)-C(20) | 1.33(2) | C(52)-C(51) | 1.43(3) |
| N(3)-N(4) | 1.410(19) | C(52)-C(53) | 1.43(3) |
| N(3)-C(35) | 1.320(19) | C(10)-C(9) | 1.42(2) |
| O(3)-C(30) | 1.21(2) | C(10)-C(11) | 1.34(2) |
| C(1)-C(2) | 1.33(2) | C(43)-C(48) | 1.39(2) |
| C(1)-C(6) | 1.39(2) | C(43)-C(44) | 1.43(3) |
| N(4)-C(36) | 1.29(2) | C(51)-C(50) | 1.37(3) |
| C(23)-C(22) | 1.395(18) | C(12)-C(11) | 1.32(2) |
| C(23)-C(24) | 1.40(2) | C(9)-C(8) | 1.38(2) |
| C(23)-C(27) | 1.41(2) | C(48)-C(47) | 1.39(3) |
| C(32)-C(31) | 1.43(2) | C(42)-C(37) | 1.40(2) |
| C(32)-C(35) | 1.48(2) | C(42)-C(41) | 1.32(2) |
| C(32)-C(33) | 1.32(2) | C(54)-C(53) | 1.38(3) |
| C(2)-C(3) | 1.37(2) | C(37)-C(36) | 1.42(3) |
| C(4)-C(5) | 1.38(2) | C(37)-C(38) | 1.48(2) |
| C(4)-C(3) | 1.40(2) | C(41)-C(40) | 1.44(2) |
| C(19)-C(18) | 1.472(19) | C(39)-C(38) | 1.33(3) |
| C(31)-C(28) | 1.39(2) | C(39)-C(40) | 1.39(3) |
| C(21)-C(22) | 1.37(2) | C(44)-C(45) | 1.45(3) |
| C(21)-C(20) | 1.49(2) | C(45)-C(46) | 1.35(3) |
| C(21)-C(26) | 1.39(2) | C(46)-C(47) | 1.34(3) |

Symmetry code: 1x, y, z; 2-x, -y, -z.

**Supplementary Table 9.** Selected bond angles [°] for Pt2**LQ**Cl2.

| Bond | Bond Angles (°) | Bond | Bond Angles (°) |
| --- | --- | --- | --- |
| P(1)-Pt(1)-Cl(1) | 93.48(16) | C(13)-C(18)-C(19) | 127.4(16) |
| O(1)-Pt(1)-P(1) | 173.8(3) | C(17)-C(18)-C(19) | 112.0(15) |
| O(1)-Pt(1)-Cl(1) | 91.7(4) | C(17)-C(18)-C(13) | 120.6(15) |
| N(1)-Pt(1)-P(1) | 95.5(3) | O(4)-C(35)-N(3) | 124.3(14) |
| N(1)-Pt(1)-Cl(1) | 171.0(3) | O(4)-C(35)-C(32) | 118.3(13) |
| N(1)-Pt(1)-O(1) | 79.4(5) | N(3)-C(35)-C(32) | 117.3(12) |
| P(2)-Pt(2)-Cl(2) | 92.96(15) | C(23)-C(24)-C(30) | 120.8(17) |
| O(4)-Pt(2)-Cl(2) | 92.0(3) | C(25)-C(24)-C(23) | 120.5(14) |
| O(4)-Pt(2)-P(2) | 174.6(3) | C(25)-C(24)-C(30) | 118.7(16) |
| N(4)-Pt(2)-Cl(2) | 172.2(4) | C(32)-C(33)-C(34) | 123.2(14) |
| N(4)-Pt(2)-P(2) | 94.6(4) | C(2)-C(3)-C(4) | 123.2(18) |
| N(4)-Pt(2)-O(4) | 80.5(5) | O(2)-C(27)-C(23) | 122.4(14) |
| C(1)-P(1)-Pt(1) | 112.3(5) | O(2)-C(27)-C(28) | 119.2(15) |
| C(13)-P(1)-Pt(1) | 111.8(5) | C(23)-C(27)-C(28) | 118.3(15) |
| C(13)-P(1)-C(1) | 105.7(8) | O(1)-C(20)-N(2) | 126.5(14) |
| C(7)-P(1)-Pt(1) | 115.9(5) | O(1)-C(20)-C(21) | 118.9(16) |
| C(7)-P(1)-C(1) | 105.6(7) | N(2)-C(20)-C(21) | 114.6(15) |
| C(7)-P(1)-C(13) | 104.7(8) | C(18)-C(17)-C(16) | 121.8(18) |
| C(49)-P(2)-Pt(2) | 113.7(6) | C(25)-C(26)-C(21) | 118.9(16) |
| C(43)-P(2)-Pt(2) | 115.6(6) | C(12)-C(7)-P(1) | 121.9(12) |
| C(43)-P(2)-C(49) | 104.7(9) | C(8)-C(7)-P(1) | 120.4(10) |
| C(43)-P(2)-C(42) | 102.6(9) | C(8)-C(7)C-(12) | 117.6(14) |
| C(42)-P(2)-Pt(2) | 112.8(6) | C(14)-C(15)-C(16) | 120.9(17) |
| C(42)-P(2)-C(49) | 106.3(9) | C(17)-C(16)-C(15) | 114.9(19) |
| C(20)-O(1)-Pt(1) | 108.9(11) | C(50)-C(49)-P(2) | 117.2(16) |
| C(35)-O(4)-Pt(2) | 109.6(9) | C(54)-C(49)-P(2) | 118.1(14) |
| N(2)-N(1)-Pt(1) | 113.6(10) | C(54)-C(49)-C(50) | 125(2) |
| C(19)-N(1)-Pt(1) | 133.2(10) | C(53)-C(52)-C(51) | 114.4(19) |
| C(19)-N(1)-N(2) | 112.6(13) | O(3)-C(30)C-(29) | 120.9(14) |
| C(20)-N(2)-N(1) | 110.6(14) | O(3)-C(30)C-(24) | 122.4(17) |
| C(35)-N(3)-N(4) | 112.9(12) | C(24)-C(30)-C(29) | 116.6(15) |
| C(2)-C(1)-P(1) | 117.9(13) | C(15)-C(14)-C(13) | 124.2(17) |
| C(2)-C(1)-C(6) | 120.4(17) | C(11)-C(10)-C(9) | 118.9(16) |
| C(6)-C(1)-P(1) | 121.7(15) | C(48)-C(43)-P(2) | 124.8(18) |
| N(3)-N(4)-Pt(2) | 112.4(10) | C(48)-C(43)-C(44) | 118(2) |
| C(36)-N(4)-Pt(2) | 133.2(14) | C(44)-C(43)-P(2) | 116.7(14) |
| C(36)-N(4)-N(3) | 114.3(15) | C(50)-C(51)-C(52) | 121.9(19) |
| C(22)-C(23)-C(24) | 114.9(15) | C(11)-C(12)-C(7) | 121.3(16) |
| C(22)-C(23)-C(27) | 123.0(15) | C(8)-C(9)-C(10) | 119.2(17) |
| C(24)-C(23)-C(27) | 122.1(14) | C(7)-C(8)-C(9) | 120.8(15) |
| C(31)-C(32)-C(35) | 119.5(14) | C(26)-C(25)-C(24) | 122.1(17) |
| C(33)-C(32)-C(31) | 120.4(16) | C(51)-C(50)-C(49) | 118.1(19) |
| C(33)-C(32)-C(35) | 120.1(13) | C(43)-C(48)-C(47) | 117(2) |
| C(1)-C(2)-C(3) | 119.5(18) | C(37)-C(42)-P(2) | 120.2(13) |
| C(5)-C(4)-C(3) | 114.4(17) | C(41)-C(42)-P(2) | 121.0(13) |
| N(1)-C(19)-C(18) | 125.6(15) | C(41)-C(42)-C(37) | 118.8(16) |
| C(28)-C(31)-C(32) | 118.1(15) | C(49)-C(54)-C(53) | 114.8(18) |
| C(22)-C(21)-C(20) | 120.9(16) | C(42)-C(37)-C(36) | 130.6(15) |
| C(22)-C(21)-C(26) | 117.9(13) | C(42)-C(37)-C(38) | 114.5(17) |
| C(26)-C(21)-C(20) | 121.3(16) | C(36)-C(37)-C(38) | 114.8(16) |
| C(21)-C(22)-C(23) | 125.7(15) | C(54)-C(53)-C(52) | 125.7(19) |
| C(5)-C(6)-C(1) | 118.9(17) | C(29)-C(34)-C(33) | 115.3(16) |
| C(18)-C(13)-P(1) | 123.0(12) | N(4)-C(36)C-(37) | 125.7(16) |
| C(14)-C(13)-P(1) | 119.5(12) | C(42)-C(41)-C(40) | 126.1(19) |
| C(14)-C(13)-C(18) | 117.0(15) | C(38)-C(39)-C(40) | 117.5(18) |
| C(31)-C(28)-C(27) | 118.6(15) | C(12)-C(11)-C(10) | 121.9(15) |
| C(29)-C(28)-C(31) | 120.6(13) | C(39)-C(38)-C(37) | 126(2) |
| C(29)-C(28)-C(27) | 120.7(15) | C(39)-C(40)-C(41) | 116.8(19) |
| C(6)-C(5)-C(4) | 123.4(16) | C(43)-C(44)-C(45) | 120(2) |
| C(28)-C(29)-C(30) | 121.1(13) | C(46)-C(45)-C(44) | 118(2) |
| C(28)-C(29)-C(34) | 122.2(16) | C(47)-C(46)-C(45) | 120(2) |
| C(34)-C(29)-C(30) | 116.7(15) | C(46)-C(47)-C(48) | 125(2) |

Symmetry code: 1x, y, z; 2-x, -y, -z.


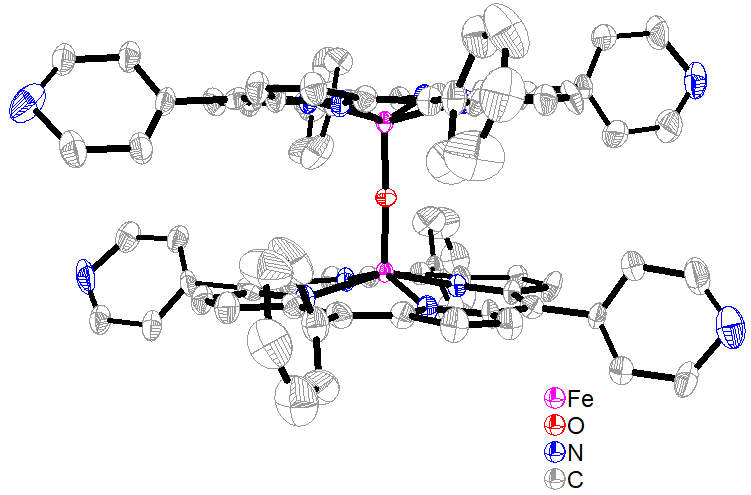


**Supplementary Figure 4.** The coordination configuration of complex (**LFe**)2-O showing 30% probability displacement ellipsoids of atoms. Hydrogen atoms were omitted for clarity. Symmetry code: 1x, y, z; 2-x, -y, z; 3x+1/2, -y+1/2, z; 4-x+1/2, y+1/2, z; 5x, y+1/2, z+1/2; 6-x, -y+1/2, z+1/2; 7x+1/2, -y+1, z+1/2; 8-x+1/2, y+1, z+1/2.


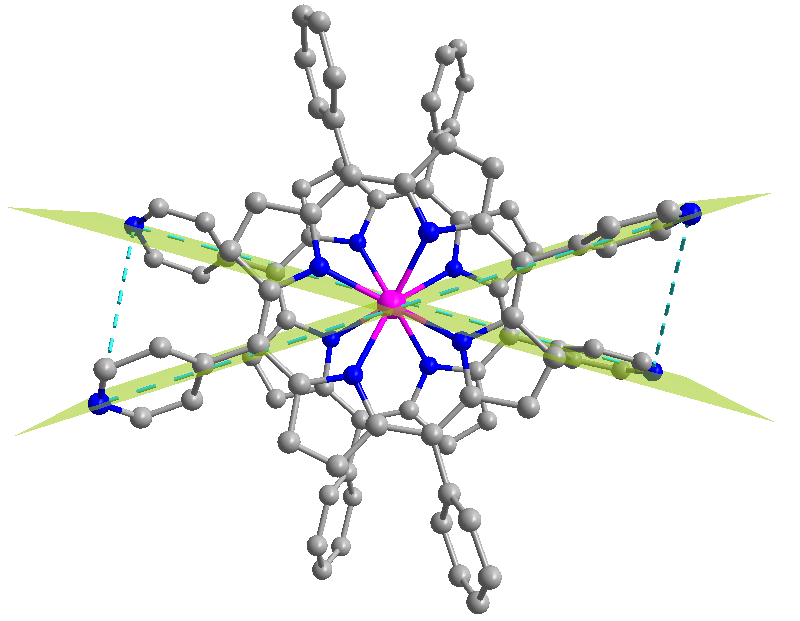


**15.46 Å**

**6.63 Å**

**34°**

**Supplementary Figure 5.** The crystal structure of complex **(LFe)**2-O showing the distance between N atoms and the torsion angle between two FeIII-porphyrin ligands. Fe pink, O red, N blue and C gray.

**Supplementary Table 10.** Crystallographic data and structure refinement for complex (**LFe**)2-O.

| Compound | Complex (**LFe**)2-O |
| --- | --- |
| CCDC number | 2396336 |
| Empirical formula | C84H52Fe2N12O |
| Formula weight | 1357.07 |
| Temperature / K | 302 |
| Crystal system | orthorhombic |
| Space group | Aba2 |
| *a* / Å | 18.0793(11) |
| *b* / Å | 24.9505(17) |
| *c* / Å | 14.9940(10) |
| *α* /° | 90 |
| *β* /° | 90 |
| *γ* /° | 90 |
| Volume /Å3 | 6763.6(8) |
| Z | 4 |
| *ρ*cale g/cm3 | 1.333 |
| μ /mm-1 | 3.901 |
| F(000) | 2800 |
| Crystal size/mm3 | 0.13 × 0.12 × 0.11 |
| Radiation | CuKα (λ = 1.54178) |
| 2θ range for data collection /° | 7.086 to 137.146 |
| Index ranges | -21 ≤ h ≤ 21, -30 ≤ k ≤ 30, -18 ≤ l ≤ 18 |
| Reflections collected | 30492 |
| Independent reflections | 6105 [Rint = 0.0823, Rsigma = 0.0786] |
| Data/restraints/parameters | 6105/1/447 |
| Goodness-of-fit on F2 | 0.983 |
| Final *R* indexes [I>=2σ(I)] | R1 = 0.0447, wR2 = 0.1020 |
| Final *R* indexes [all data] | R1 = 0.0660, wR2 = 0.1141 |
| Largest diff. peak/hole /eÅ-3 | 0.22/-0.55 |

*R*1 = ∑׀׀*F*o׀−׀*F*c׀׀/∑׀*F*o׀. *wR*2 = [∑*w*(*F*o2−Fc2)2/∑*w*(*F*o2)2]1/2

**Supplementary Table 11.** Selected bond lengths [Å] for complex (**LFe**)2-O.

| Bond | Length/Å | Bond | Length/Å |
| --- | --- | --- | --- |
| Fe(1)-O(1) | 1.7580(7) | N(4)-C(17) | 1.377(7) |
| Fe(1)-N(4) | 2.080(4) | N(4)-C(20) | 1.373(6) |
| Fe(1)-N(3) | 2.087(4) | N(3)-C(15) | 1.380(7) |
| Fe(1)-N(1) | 2.071(4) | N(3)-C(12) | 1.374(6) |
| Fe(1)-N(2) | 2.085(4) | N(1)-C(2) | 1.378(6) |
| N(2)-C(10) | 1.366(7) | N(1)-C(5) | 1.393(7) |
| N(2)-C(7) | 1.385(7) | C(32)-C(31) | 1.400(12) |

Symmetry code: 1x, y, z; 2-x, -y, z; 3x+1/2, -y+1/2, z; 4-x+1/2, y+1/2, z; 5x, y+1/2, z+1/2; 6-x, -y+1/2, z+1/2; 7x+1/2, -y+1, z+1/2; 8-x+1/2, y+1, z+1/2.

**Supplementary Table 12.** Selected bond angles [°] for complex (**LFe**)2-O.

| Bond | Bond Angles (°) | Bond | Bond Angles (°) |
| --- | --- | --- | --- |
| O(1)-Fe(1)-N(4) | 104.4(2) | C(20)-N(4)-C(17) | 106.0(4) |
| O(1)-Fe(1)-N(3) | 101.89(17) | C(15)-N(3)-Fe(1) | 125.5(3) |
| O(1)-Fe(1)-N(1) | 106.59(17) | C(12)-N(3)-Fe(1) | 124.6(3) |
| O(1)-Fe(1)-N(2) | 102.1(2) | C(12)-N(3)-C(15) | 106.6(4) |
| N(4)-Fe(1)-N(3) | 86.80(17) | C(2)-N(1)-Fe(1) | 127.7(4) |
| N(4)-Fe(1)-N(2) | 153.49(17) | C(2)-N(1)-C(5) | 104.8(4) |
| N(1)-Fe(1)-N(4) | 86.52(17) | C(5)-N(1)-Fe(1) | 127.3(4) |
| N(1)-Fe(1)-N(3) | 151.52(19) | C(10)-N(2)-Fe(1) | 124.3(3) |
| N(1)-Fe(1)-N(2) | 86.72(17) | C(10)-N(2)-C(7) | 106.5(4) |
| N(2)-Fe(1)-N(3) | 87.03(16) | C(7)-N(2)-Fe(1) | 126.6(4) |
| C(17)-N(4)-Fe(1) | 126.3(3) | C(20)-N(4)-Fe(1) | 126.3(3) |

Symmetry code: 1x, y, z; 2-x, -y, z; 3x+1/2, -y+1/2, z; 4-x+1/2, y+1/2, z; 5x, y+1/2, z+1/2; 6-x, -y+1/2, z+1/2; 7x+1/2, -y+1, z+1/2; 8-x+1/2, y+1, z+1/2.


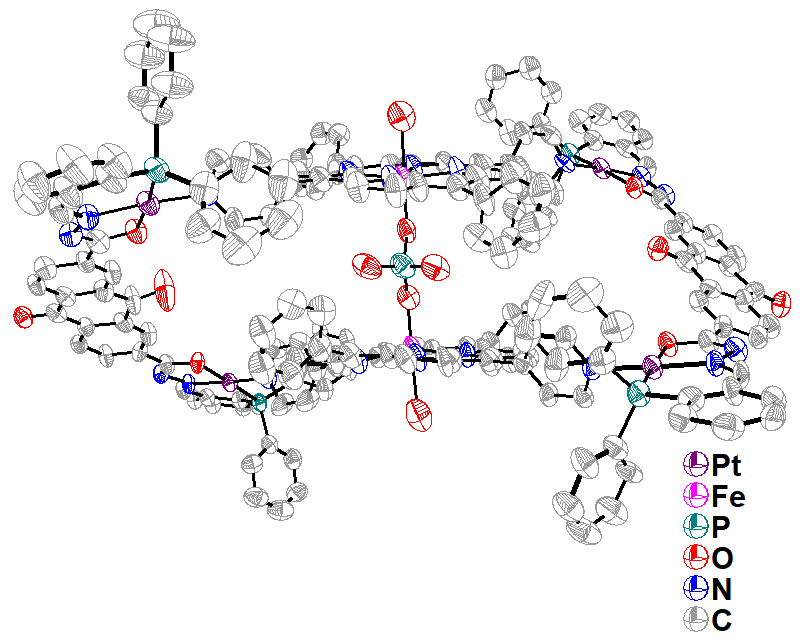


**Supplementary Figure 6.** The coordination configuration of metal-organic capsule **H2** showing 30% probability displacement ellipsoids of atoms. Pt violet, Fe pink, P teal, O red, N blue and C gray. Hydrogen atoms, counterions, and solvent molecules were omitted for clarity. Symmetry code: 1x, y, z; 2-x+1/2, y+1/2, -z+1/2; 3-x, -y, -z; 4x-1/2, -y-1/2, z-1/2.


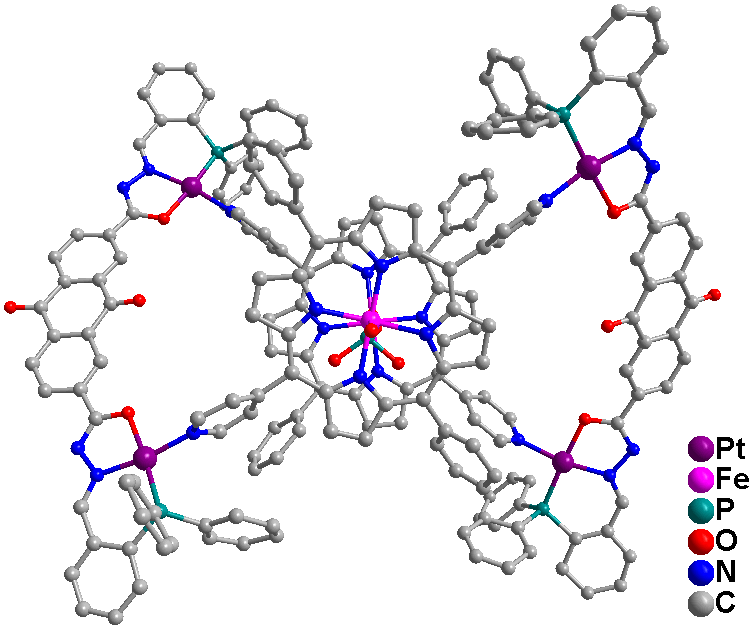


**Supplementary Figure 7.** A vertical view of crystal **H2**. Pt violet, Fe pink, P teal, O red, N blue and C gray. Hydrogen atoms, counterions, and solvent molecules were omitted for clarity.


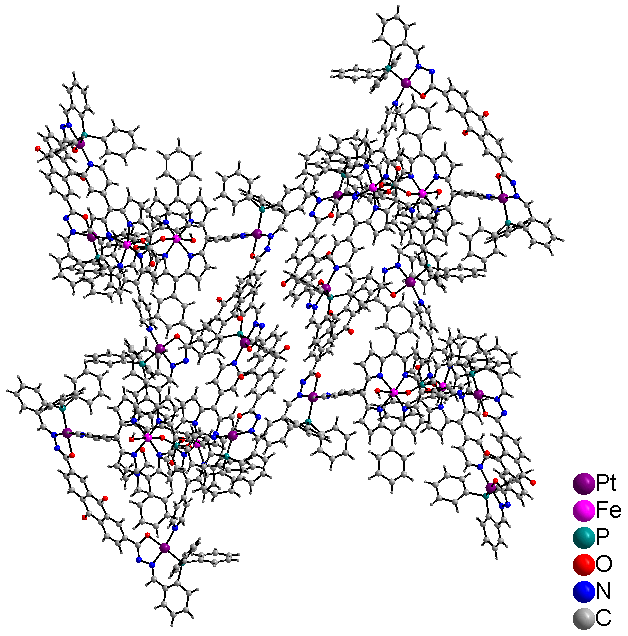


**Supplementary Figure 8.** Crystal packing model of metal-organic capsule **H2**. Counterions and solvent molecules were omitted for clarity.


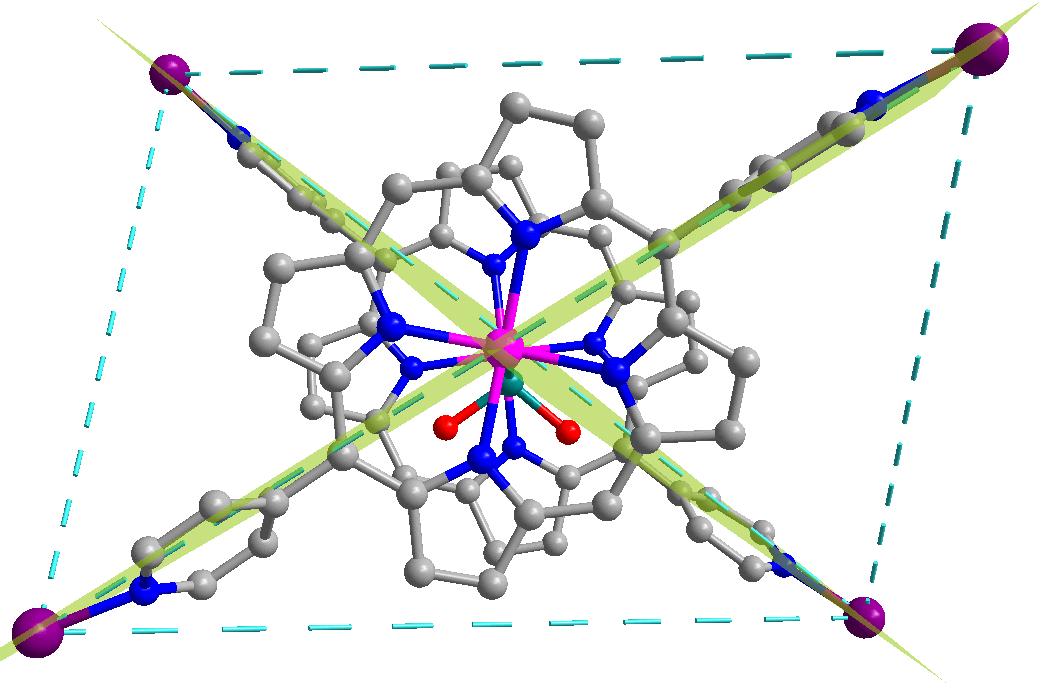


**69°**

**13.16 Å**

**19.38 Å**

**17.28 Å**

**Supplementary Figure 9.** The partial crystal structure of metal-organic capsule **H2** showing the distance between Pt atoms and the torsion angle between two FeIII-porphyrin ligands. Pt violet, Fe pink, P teal, O red, N blue and C gray.


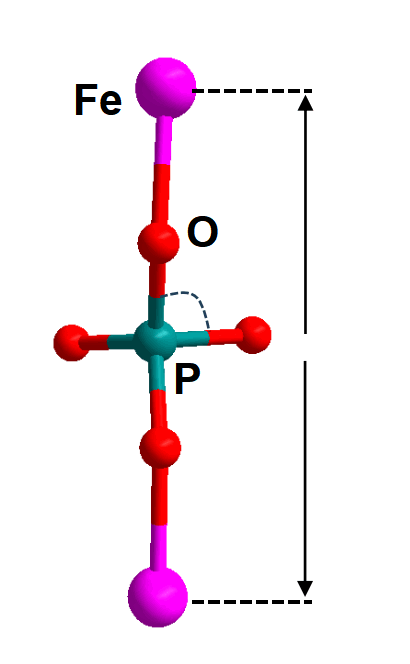


**6.27 Å**

**104.8°**

**1.88 Å**

**1.53 Å**

**1.48 Å**

**1.90 Å**

**Supplementary Figure 10.** The partial crystal structure of metal-organic capsule **H2**. Fe pink, P teal, and O red.

**Supplementary Table 13.** Crystallographic data and structure refinement for metal-organic capsule **H2**.

| Compound | Capsule **H2** |
| --- | --- |
| CCDC number | 2377724 |
| Empirical formula | C201H162F12Fe2N23O24P7Pt4 |
| Formula weight | 4620.38 |
| Temperature /K | 100 |
| Crystal system | monoclinic |
| Space group | P21/n |
| *a* / Å | 21.0539(6) |
| *b* / Å | 34.6467(9) |
| *c* / Å | 42.8754(11) |
| *α* /° | 90 |
| *β* /° | 92.986(2) |
| *γ* /° | 90 |
| Volume /Å3 | 31232.9(14) |
| Z | 4 |
| *ρ*cale g/cm3 | 0.983 |
| μ /mm-1 | 4.767 |
| F(000) | 9192 |
| Crystal size/mm3 | 0.14 × 0.13 × 0.12 |
| Radiation | CuKα (λ = 1.54178) |
| 2θ range for data collection /° | 4.128 to 136.874 |
| Index ranges | -25 ≤ h ≤ 20, -38 ≤ k ≤ 41, -50 ≤ l ≤ 51 |
| Reflections collected | 176011 |
| Independent reflections | 54335 [Rint = 0.1343, Rsigma = 0.1507] |
| Data/restraints/parameters | 54335/2582/2458 |
| Goodness-of-fit on F2 | 0.883 |
| Final *R* indexes [I>=2σ(I)] | R1 = 0.0936, wR2 = 0.2343 |
| Final *R* indexes [all data] | R1 = 0.1681, wR2 = 0.2715 |
| Largest diff. peak/hole /eÅ-3 | 1.88/-3.06 |

*R*1 = ∑׀׀*F*o׀−׀*F*c׀׀/∑׀*F*o׀. *wR*2 = [∑*w*(*F*o2−Fc2)2/∑*w*(*F*o2)2]1/2

**Supplementary Table 14.** Selected bond lengths [Å] for metal-organic capsule **H2**.

| Bond | Length/Å | Bond | Length/Å |
| --- | --- | --- | --- |
| Pt(3)-P(102) | 2.210(3) | Fe(31)-N(301) | 2.105(9) |
| Pt(3)-O(104) | 2.036(8) | Fe(31)-O(501) | 1.895(12) |
| Pt(3)-N(306) | 2.031(9) | Fe(31)-N(302) | 2.052(11) |
| Pt(3)-N(104) | 1.953(8) | Fe(31)-N(303) | 2.047(10) |
| Pt(1)-P(201) | 2.209(3) | Fe(31)-N(304) | 2.062(11) |
| Pt(1)-O(201) | 2.057(7) | Fe(31)-O(505) | 2.470(15) |
| Pt(1)-N(305) | 2.039(9) | Fe(41)-O(502) | 1.877(11) |
| Pt(1)-N(201) | 1.985(10) | Fe(41)-N(402) | 2.075(11) |
| Pt(4)-P(101) | 2.200(3) | Fe(41)-N(403) | 2.078(11) |
| Pt(4)-O(101) | 2.033(8) | Fe(41)-O(506) | 2.270(15) |
| Pt(4)-N(101) | 1.959(10) | Fe(41)-N(401) | 2.041(12) |
| Pt(4)-N(406) | 2.025(10) | Fe(41)-N(404) | 2.052(11) |
| Pt(2)-P(202) | 2.205(4) | P(501)-O(502) | 1.526(10) |
| Pt(2)-O(204) | 2.047(8) | P(501)-O(501) | 1.481(11) |
| Pt(2)-N(405) | 2.055(11) | P(501)-O(504) | 1.572(12) |
| Pt(2)-N(204) | 1.964(11) | P(501)-O(503) | 1.553(12) |

Symmetry code: 1x, y, z; 2-x+1/2, y+1/2, -z+1/2; 3-x, -y, -z; 4x-1/2, -y-1/2, z-1/2.

**Supplementary Table 15.** Selected bond angles [°] for metal-organic capsule **H2**.

| Bond | Angles (°) | Bond | Angles (°) |
| --- | --- | --- | --- |
| O(104)-Pt(3)-P(102) | 177.02(19) | C(138)-P(102)-C(143) | 107.1(5) |
| N(306)-Pt(3)-P(102) | 95.7(3) | C(138)-P(102)-C(149) | 105.0(6) |
| N(306)-Pt(3)-O(104) | 87.2(4) | C(149)-P(102)-Pt(3) | 113.4(5) |
| N(104)-Pt(3)-P(102) | 96.2(3) | C(149)-P(102)-C(143) | 108.6(6) |
| N(104)-Pt(3)-O(104) | 80.9(3) | C(207)-P(201)-Pt(1) | 111.4(5) |
| N(104)-Pt(3)-N(306) | 168.1(4) | C(208)-P(201)-Pt(1) | 112.7(5) |
| O(201)-Pt(1)-P(201) | 176.6(2) | C(208)-P(201)-C(207) | 106.3(6) |
| N(305)-Pt(1)-P(201) | 95.1(3) | C(214)-P(201)-Pt(1) | 110.8(5) |
| N(305)-Pt(1)-O(201) | 88.3(3) | C(214)-P(201)-C(207) | 105.4(7) |
| N(201)-Pt(1)-P(201) | 96.0(3) | C(214)-P(201)-C(208) | 109.8(8) |
| N(201)-Pt(1)-O(201) | 80.7(4) | C(114)-P(101)-Pt(4) | 110.6(6) |
| N(201)-Pt(1)-N(305) | 168.7(4) | C(109)-P(101)-Pt(4) | 112.1(6) |
| O(101)-Pt(4)-P(101) | 176.4(3) | C(109)-P(101)-C(114) | 111.6(9) |
| N(101)-Pt(4)-P(101) | 94.9(3) | C(109)-P(101)-C(107) | 102.9(8) |
| N(101)-Pt(4)-O(101) | 81.6(4) | C(107)-P(101)-Pt(4) | 111.3(5) |
| N(101)-Pt(4)-N(406) | 171.4(4) | C(107)-P(101)-C(114) | 108.1(9) |
| N(406)-Pt(4)-P(101) | 93.6(3) | C(249)-P(202)-Pt(2) | 114.8(5) |
| N(406)-Pt(4)-O(101) | 89.9(4) | C(249)-P(202)-C(243) | 106.8(9) |
| O(204)-Pt(2)-P(202) | 172.3(3) | C(238)-P(202)-Pt(2) | 111.8(5) |
| O(204)-Pt(2)-N(405) | 89.5(4) | C(238)-P(202)-C(249) | 105.5(8) |
| N(405)-Pt(2)-P(202) | 96.2(3) | C(238)-P(202)-C(243) | 107.1(8) |
| N(204)-Pt(2)-P(202) | 95.3(3) | C(243)-P(202)-Pt(2) | 110.5(6) |
| N(204)-Pt(2)-O(204) | 79.0(4) | O(502)-P(501)-O(504) | 106.6(6) |
| N(204)-Pt(2)-N(405) | 168.5(4) | O(502)-P(501)-O(503) | 112.5(7) |
| N(301)-Fe(31)-O(505) | 81.4(5) | O(501)-P(501)-O(502) | 113.1(6) |
| O(501)-Fe(31)-N(301) | 98.6(4) | O(501)-P(501)-O(504) | 104.8(8) |
| O(501)-Fe(31)-N(302) | 99.0(5) | O(501)-P(501)-O(503) | 114.7(6) |
| O(501)-Fe(31)-N(303) | 99.3(5) | O(503)-P(501)-O(504) | 104.0(9) |
| O(501)-Fe(31)-N(304) | 100.3(5) | C(130)-O(104)-Pt(3) | 108.0(6) |
| O(501)-Fe(31)-O(505) | 177.3(5) | C(120)-O(101)-Pt(4) | 106.1(7) |
| N(302)-Fe(31)-N(301) | 89.5(4) | P(501)-O(502)-Fe(41) | 139.6(6) |
| N(302)-Fe(31)-N(304) | 160.7(5) | C(220)-O(201)-Pt(1) | 107.4(7) |
| N(302)-Fe(31)-O(505) | 83.7(5) | C(230)-O(204)-Pt(2) | 107.5(8) |
| N(303)-Fe(31)-N(301) | 162.2(5) | C(130)-N(103)-N(104) | 108.8(8) |
| N(303)-Fe(31)-N(302) | 88.0(4) | C(305)-N(301)-Fe(31) | 123.2(9) |
| N(303)-Fe(31)-N(304) | 88.9(4) | C(302)-N(301)-Fe(31) | 124.7(7) |
| N(303)-Fe(31)-O(505) | 80.8(6) | C(302)-N(301)-C(305) | 109.3(9) |
| N(304)-Fe(31)-N(301) | 87.7(4) | C(230)-N(203)-N(204) | 106.4(11) |
| N(304)-Fe(31)-O(505) | 77.0(5) | P(501)-O(501)-Fe(31) | 140.6(7) |
| O(502)-Fe(41)-N(402) | 99.0(4) | C(307)-N(302)-Fe(31) | 126.2(9) |
| O(502)-Fe(41)-N(403) | 95.1(4) | C(310)-N(302)-Fe(31) | 125.7(9) |
| O(502)-Fe(41)-O(506) | 176.2(5) | C(310)-N(302)-C(307) | 106.6(11) |
| O(502)-Fe(41)-N(401) | 95.6(5) | C(407)-N(402)-C(410) | 106.9(12) |
| O(502)-Fe(41)-N(404) | 93.7(5) | C(142)-C(137)-C(136) | 115.2(10) |
| N(402)-Fe(41)-N(403) | 88.5(5) | C(142)-C(137)-C(138) | 116.7(11) |
| N(402)-Fe(41)-O(506) | 84.2(5) | C(138)-C(137)-C(136) | 128.1(10) |
| N(403)-Fe(41)-O(506) | 86.9(5) | C(129)-C(128)-C(127) | 124.3(10) |
| N(401)-Fe(41)-N(402) | 91.0(5) | C(131)-C(132)-C(133) | 119.1(11) |
| N(401)-Fe(41)-N(403) | 169.2(5) | C(124)-C(132)-C(131) | 119.6(11) |
| N(401)-Fe(41)-O(506) | 82.4(6) | C(124)-C(132)-C(133) | 121.3(11) |
| N(401)-Fe(41)-N(404) | 88.5(5) | C(138)-C(139)-C(140) | 121.9(11) |
| N(404)-Fe(41)-N(402) | 167.2(6) | C(415)-N(403)-Fe(41) | 127.1(9) |
| N(404)-Fe(41)-N(403) | 89.6(4) | C(415)-N(403)-C(97) | 106.9(11) |
| N(404)-Fe(41)-O(506) | 83.1(6) | C(148)-C(143)-P(102) | 121.5(11) |
| C(143)-P(102)-Pt(3) | 111.2(4) | C(148)-C(143)-C(144) | 121.2(12) |
| C(138)-P(102)-Pt(3) | 111.2(4) | C(220)-N(202)-N(201) | 109.7(10) |
| C(97)-N(403)-Fe(41) | 126.0(9) | C(123)-C(122)-C(121) | 120.2(11) |
| C(224)-C(234)-C(235) | 120.0(13) | C(141)-C(142)-C(137) | 123.7(12) |
| C(224)-C(234)-C(233) | 120.8(12) | C(202)-C(207)-P(201) | 124.2(9) |
| C(235)-C(234)-C(233) | 119.2(13) | C(202)-C(207)-C(206) | 120.9(12) |
| C(144)-C(143)-P(102) | 116.6(9) | C(206)-C(207)-P(201) | 114.6(10) |

Symmetry code: 1x, y, z; 2-x+1/2, y+1/2, -z+1/2; 3-x, -y, -z; 4x-1/2, -y-1/2, z-1/2.

**ESI-MS Spectra**

| Peak | Value of *m/z* | Species assigned |
| --- | --- | --- |
| 1 | 358.0368 | [**GFe**−2Cl−H]**+** |

**Supplementary Figure 11.** ESI-MS analysis of complex **GFe** (1.0 mM) in CH3CN solution. The insert shows the measured and simulated isotopic patterns at *m/z* = 358.0368.

| Peak | Value of *m/z* | Species assigned |
| --- | --- | --- |
| 1 | 1328.0906 | [Pt2**LQ**Cl2**·**H]+ |
| 2 | 1367.0465 | [Pt2**LQ**Cl2**·**K]+ |

**Supplementary Figure 12.** ESI-MS analysis of precursor Pt2**LQ**Cl2 (1.0 mM) in CH3CN solution. The insert shows the measured and simulated isotopic patterns at *m/z* = 1328.0906.

| Peak | Value of *m/z* | Species assigned |
| --- | --- | --- |
| 1 | 967.6506 | [Pt4**LQ**2**LFe**2**·**O]4+ |
| 2 | 1310.8635 | [Pt4**LQ**2**LFe**2**·**O**·**NO3]3+ |

**Supplementary Figure 13.** ESI-MS analysis of **H1** (1.0 mM) in DMF/CH3CN (1:1) solution. The insert shows the measured and simulated isotopic patterns at *m/z* = 967.6506.

| Peak | Value of *m/z* | Species assigned |
| --- | --- | --- |
| 1 | 1016.9124 | [Pt4**LQ**2**LFe**2**·**O**·1a**]4+ |

**Supplementary Figure 14.** ESI-MS analysis of **1a** (2.0 mM) with **H1** (1.0 mM) in DMF/CH3CN (1:1) solution. The insert shows the measured and simulated isotopic patterns at *m/z* = 1016.9124.

| Peak | Value of *m/z* | Species assigned |
| --- | --- | --- |
| 1 | 1144.1809 | [**H1·**(**GFe**−Cl−H)**·1a·**DMF**·**CH3CN]4+ |

**Supplementary Figure 15.** ESI-MS analysis of **1a** (20.0 mM) with **HG** (1.0 mM) in DMF/CH3CN (1:1). The insert shows the measured and simulated isotopic patterns at *m/z* = 1144.1809.

| Peak | Value of *m/z* | Species assigned |
| --- | --- | --- |
| 1 | 987.9009 | [Pt4**LQ**2**LFe**2**·**H**·**PO4]4+ |

**Supplementary Figure 16.** ESI-MS analysis of **H2** (1.0 mM) in DMF. The insert shows the measured and simulated isotopic patterns at *m/z* = 987.9009.

**Supplementary Figure 17.** The measured and simulated isotopic patterns at *m/z* = 973.1522 for [Pt4**LQ**2**LFe**2**·**2F]4+.

| Peak | Value of *m/z* | Species assigned |
| --- | --- | --- |
| 1 | 240.2315 | [C15H29NO**·**H]+ |

**Supplementary Figure 18.** ESI-MS analysis of radical trapping experiment. The insert shows the measured and simulated isotopic patterns at *m/z* = 240.2315. Reaction condition: Cyclohexane (1.0 M), catalyst (5.0 mM), TEMPO (0.3 M) and CH3CN (2.0 mL) under Ar atmosphere upon irradiation for 6 h.

**Supplementary Figure 19.** ESI-MS analysis of chlorine radical trapping experiments with styrene. Reaction condition: Styrene (50.0 mM), DBAD (33.0 mM), NH4Cl (33.0 mM), **GFe** (5.0 mM) in acetonitrile (3.0 mL) under irradiation with a LED for 12 h under Ar atmosphere. The insert shows the measured and simulated isotopic patterns at *m/z* = 369.1584.

| Peak | Value of *m/z* | Species assigned |
| --- | --- | --- |
| 1 | 1357.3152 | [**(LFe)**2**·**O**·**H]+ |

**Supplementary Figure 20.** ESI-MS analysis of **(LFe)**2-O (1.0 mM) in DMF. The insert shows the measured and simulated isotopic patterns at *m/z* = 1357.3152.


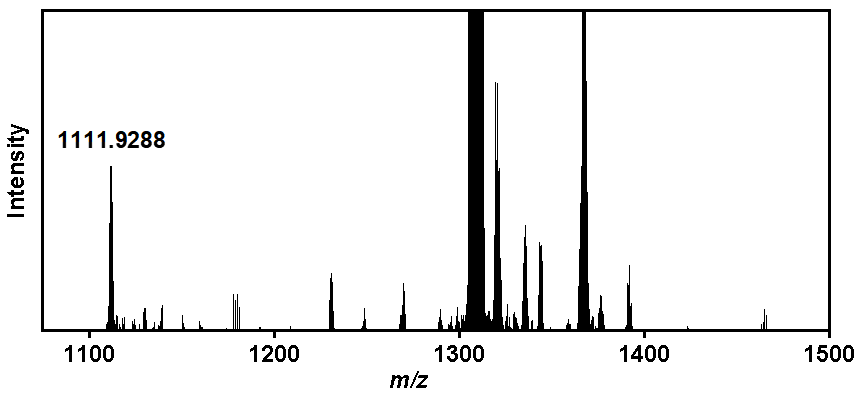


| Peak | Value of *m/z* | Species assigned |
| --- | --- | --- |
| 1 | 1111.9288 | [**H1·GFe·**2DMF]4+ |

**Supplementary Figure 21.** ESI-MS analysis of **H1** (1.0 mM) and **GFe** (3.0 mM) in DMF/CH3CN (1:1). The insert shows the measured and simulated isotopic patterns at *m/z* = 1111.9288.

**Spectral Titration**

**Supplementary Figure 22.** UV*−*vis spectra of ligand **LM** (0.1 mM) in aqueous solution upon the addition of Fe3+ (total 0.1 mM).

**(a)**

**(b)**

**Supplementary Figure 23.** (a) The UV*−*vis spectra of the solution containing **LM** and Fe3+ with different molar ratio ([**LM**] + [Fe3+] = 0.1 mM) in aqueous solution. (b) Job’s plot (260 nm) obtained by conventional batchwise method.

**(c)**

**(d)**

**(b)**

**(a)**

**Supplementary Figure 24.** (a) UV−vis spectra of triflate countered imidazole iron complex (0.1 mM) in CH3CN/H2O (1:1, pH 9.4) upon the addition of Et4NCl (5.0 mM),(b) The corresponding partial enlarged spectra and (c) the UV−vis difference absorption spectra, (d) and irradiated with 395 nm LED for 6 min.

**Supplementary Figure 25.** The UV−vis spectra of complex **GFe** (0.5 mM) and cyclohexane (0.5 M) under Ar atmosphere before and after 40 min irradiation with 395 nm LED in CH3NO2 solution.

**Supplementary Figure 26.** UV−vis spectra of ligand H2**LQ** (10.0 μM), ligand **LFe** (10.0 μM), and capsule **H1** (10.0 μM) in CH3CN/H2O (1:1, pH 9.4) solution.


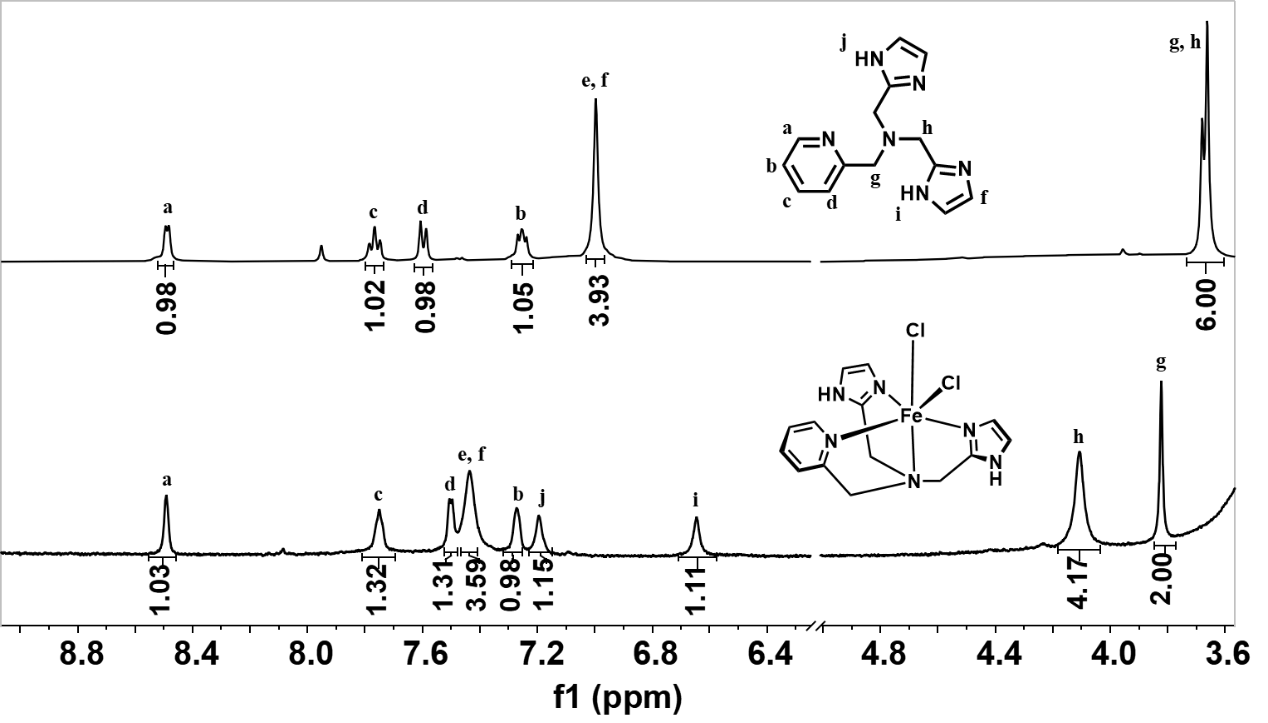


**(b)**

**(a)**

**Supplementary Figure 27.** The 1H NMR spectra of (a) ligand **LM** (2.0 mM) and (b) complex **GFe** (2.0 mM) in DMSO-*d6*.

**Supplementary Figure 28.** UV−vis spectra of **H1** (10.0 μM) over time upon 395 nm LED irradiation in anaerobic pyridine solution.

**(a)**

**(b)**

**Supplementary Figure 29.** (a) UV−vis spectra of **H1** (10.0 μM) in CH3OH (red) upon the addition of HBF4 (total 40.0 μM, blue), followed by the addition of organic base DABCO (total 40.0 μM, red short dash). (b) Enlarged spectra in the range of 550 to 750 nm.

**(b)**

**(a)**

**Supplementary Figure 30.** UV−vis absorbance variation related to TMB (10.0 mM) oxidation with **H1** (0.1 mM) in HAc/NaAc (0.1 M) solution over reaction time (a) and in the presence of (b) scavengers DABCO (20.0 mM) upon 395 nm LED irradiation under O2 atmosphere.

**(b)**

**(a)**

**Supplementary Figure 31.** UV−vis absorbance variation related to TMB (10.0 mM) oxidation with **H1** (0.1 mM) in HAc/NaAc (0.1 M) solution over reaction time in the presence of (a) scavenger BQ (20.0 mM) and (b) scavenger *t-*BuOH (20.0 mM) upon 395 nm LED irradiation under O2 atmosphere.

**(b)**

**(a)**

**Supplementary Figure 32.** UV−vis absorbance variation related to TMB (10.0 mM) oxidation with (a) **H2** (0.1 mM) or (b) **(LFe)**2-O (0.1 mM) in HAc/NaAc (0.1 M) solution over reaction time upon 395 nm LED irradiation under O2 atmosphere.

**Supplementary Figure 33.** The UV−vis absorbance changes at 370 nm related to TMB oxidation in the presence of **H1** (0.1 mM) and with different scavengers (20.0 mM), **H2** or (**LFe**)2-O to replace **H1**.

**(b)**

**(a)**

**Supplementary Figure 34.** (a) UV−vis absorbance variation related to TMB (10.0 mM) oxidation with **HG** (0.1 mM) in HAc/NaAc (0.1 M) solution over reaction time upon 395 nm LED irradiation under O2 atmosphere. (b) The difference absorption at 370 nm related to TMB oxidation with different scavengers in the presence of **HG**.

**Supplementary Figure 35.** EPR spectra of **H1** (0.5 mM) in CH3CN/H2O (1:1, pH 9.4) solution containing DMPO (95.0 mM) or TEMP (60.0 mM) upon 395 nm LED irradiation for 3 min in the presence of O2 at room temperature.

**Supplementary Figure 36.** EPR spectra of **HG** (0.5 mM) in CH3CN/H2O (1:1, pH 9.4) solution containing DMPO (95.0 mM) or TEMP (60.0 mM) upon 395 nm LED irradiation for 3 min in the presence of O2 at room temperature.

**(a)**

**(c)**

**(d)**

**(b)**

**Supplementary Figure 37.** (a) UV−vis spectra of **H1** (10.0 μM) upon the addition of complex **GFe** (total 30.0 μM) in CH3CN/H2O (1:1, pH 9.4) solution.(b) The corresponding partial enlarged spectra, (c) and the UV−vis difference absorption spectra. (d) Hill plot fitting at 410 nm in 1:1 binding model.

**(b)**

**(a)**

**Supplementary Figure 38.** (a)The normalized luminescence spectra of **H1** (10.0 μM) upon the addition of complex **GFe** (total 30.0 μM) in CH3CN/H2O (1:1, pH 9.4) solution, the luminescence intensity was recorded at 465 nm and excited at 365 nm. (b) The normalized luminescence intensity at 465 nm varied with **GFe** concentration.

**(c)**

**(d)**

**(b)**

**(a)**

**Supplementary Figure 39.** (a) UV−vis spectra of **H1** (10.0 μM) and **GFe** (10.0 μM) upon the addition of **1a** (total 20.0 μM) in CH3CN/H2O (1:1, pH 9.4) solution.(b) The corresponding partial enlarged spectra, (c) and the UV−vis difference absorption spectra. (d) Hill plot fitting at 410 nm in 1:1 binding model.

**(b)**

**(a)**

**Supplementary Figure 40.** (a) UV−vis spectra of **H2** (10.0 μM) upon the addition of **GFe** (total 40.0 μM) in CH3CN/H2O (1:1, pH 9.4) solution. (b) The corresponding UV−vis difference absorption spectra.

**(a)**

**(b)**

**Supplementary Figure 41.** (a) The UV−vis difference absorption spectra of **H1** (10.0 μM) upon the addition of **1a** (total 50.0 μM) in CH3CN/H2O (1:1, pH 9.4) solution. (b) Hill plot fitting at 410 nm in 1:1 binding model.

**(c)**

**(d)**

**(a)**

**(b)**

**Supplementary Figure 42.** (a) UV−vis spectra of **H1** (10.0 μM) and HBF4 (420 μM) upon the addition of **1a** (total 30.0 μM) in CH3CN/H2O (1:1, pH 9.4) solution.(b) The corresponding partial enlarged spectra, (c) and the UV−vis difference absorption spectra. (d) Hill plot fitting at 410 nm in 1:1 binding model.

**(a)**

**(c)**

**(d)**

**(b)**

**Supplementary Figure 43.** (a) UV−vis spectra of **H1** (10.0 μM) upon the addition of **1b** (total 30.0 μM) in CH3CN/H2O (1:1, pH 9.4) solution.(b) The corresponding partial enlarged spectra, (c) and the UV−vis difference absorption spectra. (d) Hill plot fitting at 410 nm in 1:1 binding model.

**(c)**

**(d)**

**(b)**

**(a)**

**Supplementary Figure 44.** (a) UV−vis spectra of **H1** (10.0 μM) and HBF4 (420 μM) upon the addition of **1b** (total 30.0 μM) in CH3CN/H2O (1:1, pH 9.4) solution.(b) The corresponding partial enlarged spectra, (c) and the UV−vis difference absorption spectra. (d) Hill plot fitting at 410 nm in 1:1 binding model.

**Supplementary Table 16.** Association constants *K*a of metal-organic capsule **H1** with guest **1a** or **1b** in CH3CN/H2O (1:1, pH 9.4) as determined by UV−vis titration.

| Guest | Additive | Binding Ratio (Host/Guest) | Association Constants *K*a (M−1) |
| --- | --- | --- | --- |
| **1a** | None | 1:1 | 3.2 × 104 |
| **1a** | HBF4 | 1:1 | 3.2 × 105 |
| **1b** | None | 1:1 | 2.0 × 104 |
| **1b** | HBF4 | 1:1 | 2.5 × 104 |

**(b)**

**(a)**

**Supplementary Figure 45.** (a) UV−vis spectra of **H1** (10.0 μM) upon the addition of adenosine triphosphate (ATP, total 40.0 μM) in CH3CN/H2O (1:1, pH 9.4) solution. (b) The Hill plot fitting at 410 nm.


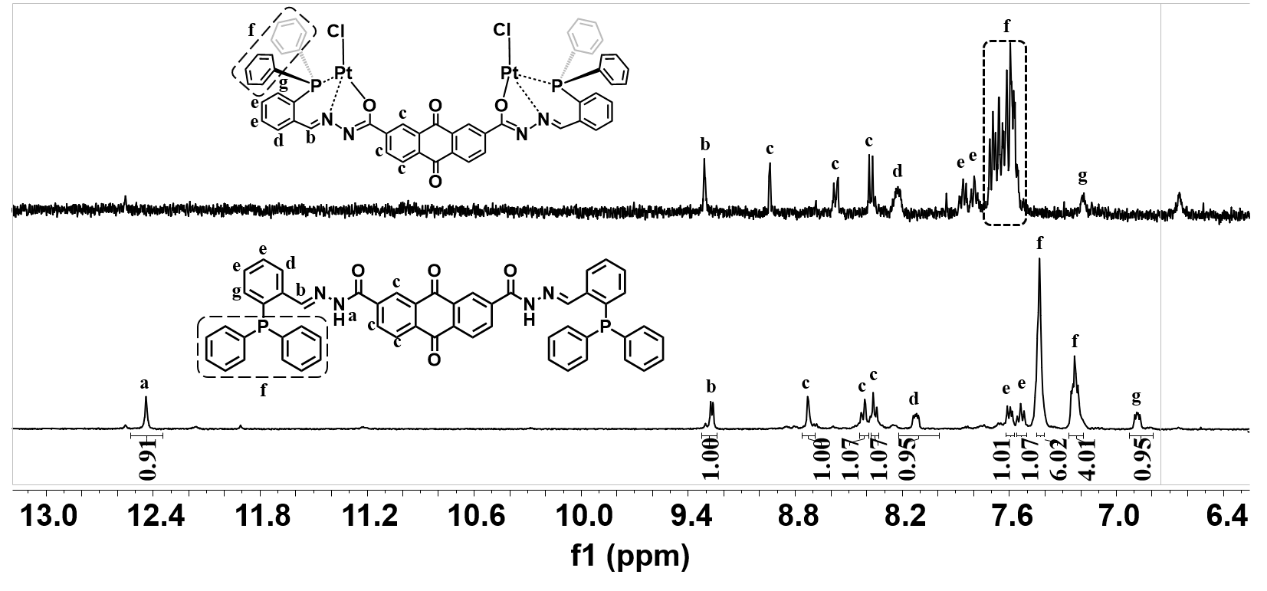


**(a)**

**(b)**

**Supplementary Figure 46.** The 1H NMR spectra of (a) precursor Pt2**LQ**Cl2 (1.0 mM) and (b) ligand H2**LQ** (1.0 mM) in DMSO-*d6*.

**
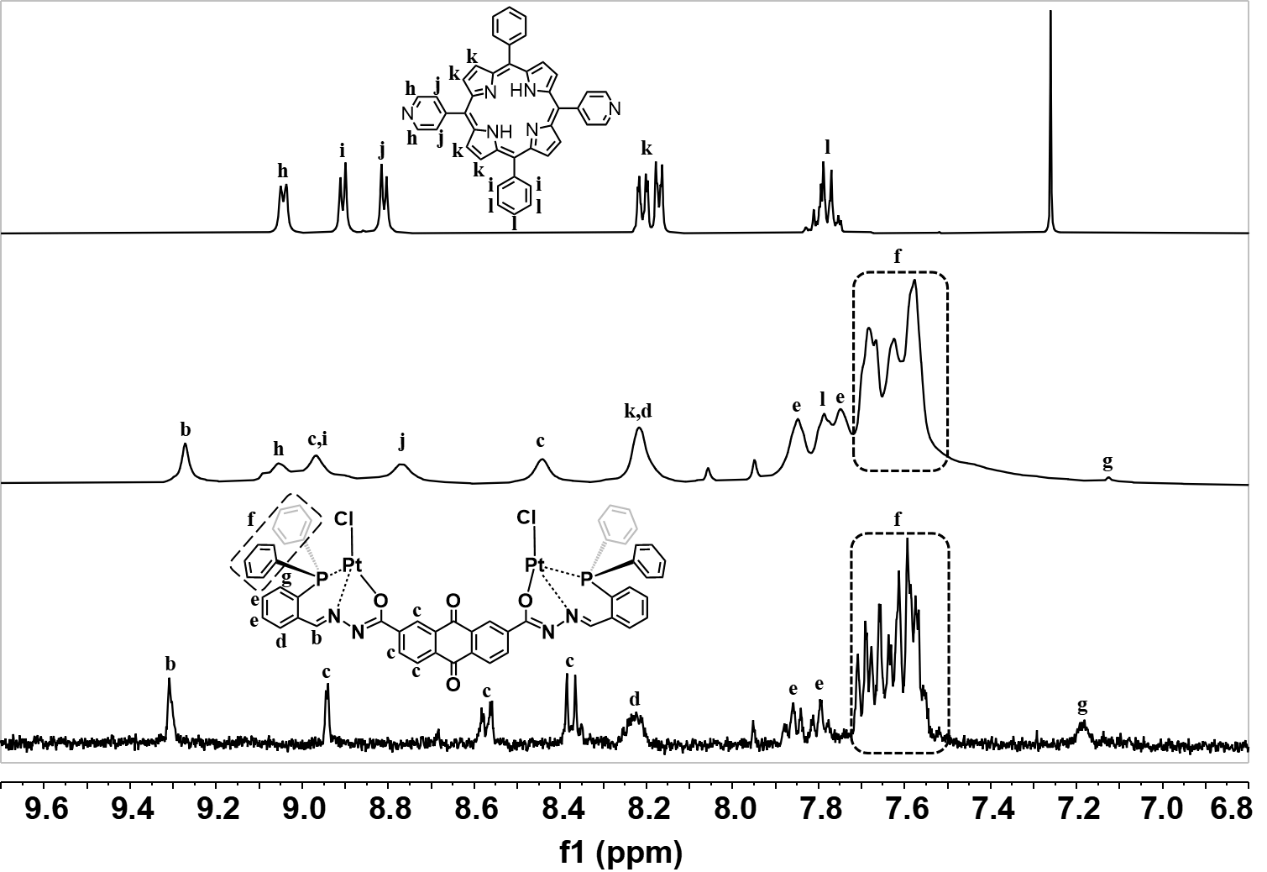
**

**(c)**

**(b)**

**(a)**

**Supplementary Figure 47.** The 1H NMR spectra of (a) ligand **LH** (2.0 mM) in CDCl3, (b) capsule **H1** (2.0 mM) in DMSO-*d*6, (c) precursor Pt2**LQ**Cl2 (1.0 mM) in DMSO-*d*6.

**(a)**

**(b)**

**Supplementary Figure 48.** The 31P NMR spectrum of (a) capsule **H1** (b) Pt2**LQ**Cl2 in DMSO-*d6*.


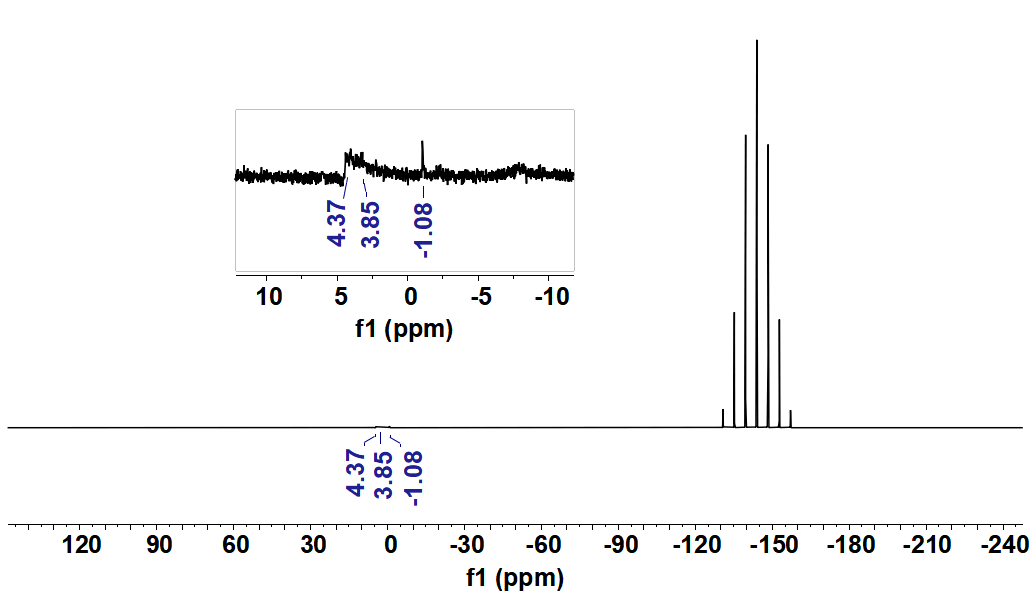


**Supplementary Figure 49.** The 31P NMR spectrum of **H1** (2.0 mM) treated with NaPF6 (100.0 mM) in DMSO-*d6*. The inset is the enlarged spectra in the range of 10 to −10 ppm.

**Supplementary Figure 50.** The 19F NMR spectrum of capsule **H1** (2.0 mM) and NaPF6 (100.0 mM) in DMSO-*d6*. The inset is the enlarged spectra in the range of −125.0 to −128.0 ppm.

**(a)**


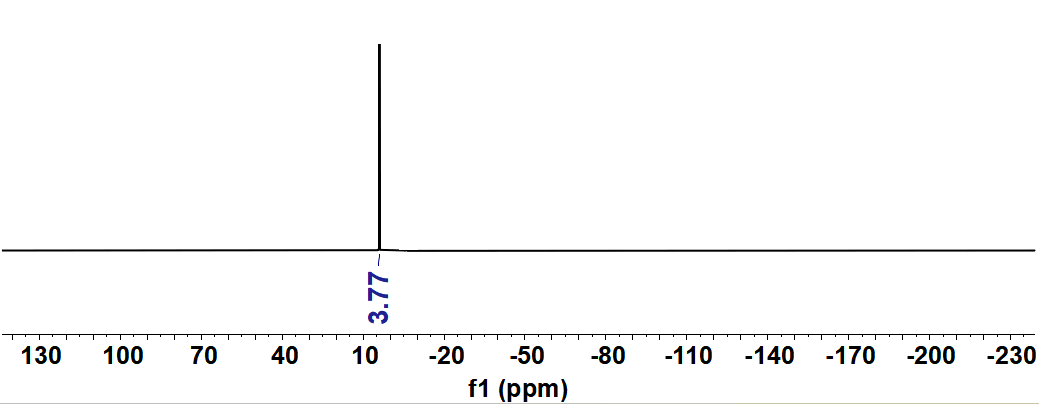


**(b)**

**Supplementary Figure 51.** (a) The 19F NMR spectrum of NaF (100.0 mM) in D2O. (b) The 31P NMR spectrum of K3PO4 (100.0 mM) in D2O.

**Supplementary Figure 52.** The 19F NMR spectrum of NaPF6 (60.0 mM) in DMSO-*d6* solution.


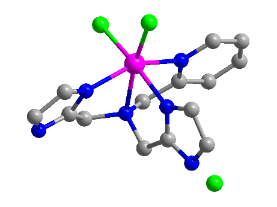

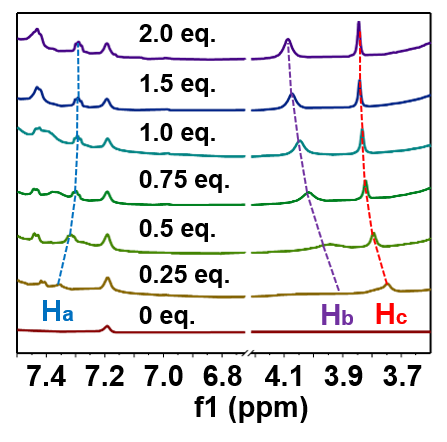


**(a)**

**Hb**

**Hc**

**Ha**

**Hc**

**Ha**

**Hb**

**(b)**

**Supplementary Figure 53.** (a) 1H NMR titration of **H1** (1.0 mM) with **GFe** (total 2.0 mM) in DMSO-*d6* solution,(b) showing 1H NMR chemical shift changes for Ha, Hb, and Hc on **GFe**.

**(b)**

**(a)**

**Supplementary Figure 54**. (a) UV−vis monitoring the spectral change of **H1** DMF solution upon the addition of 2.0, 4.0, 6.0, 8.0, and 10.0 eq. NaPF6. These samples were taken from the reaction mixture after 10 min and were then diluted 250-fold in DMF solution for UV−vis analysis. (b) The UV−vis changes at 410 and 418 nm.

**(a)**

**(b)**

**Supplementary Figure 55.** UV−vis spectra of 1,3-diphenylisobenzofuran (DPBF, 10.0 μM) oxidation in the presence of **H1** (10.0 μM) and **GFe** (10.0 μM) in CH3CN/H2O (1:1, pH 9.4) solution upon 395 nm LED irradiation with different light intensities (a) 30.0 mW**·**cm−2 and (b) 15.0 mW**·**cm−2.

**Supplementary Figure 56.** UV−vis monitoring the absorbance of DPBF at 410 nm over time. Experiment condition: DPBF (10.0 μM), **H1** (10.0 μM), and **GFe** (10.0 μM) in CH3CN/H2O (1:1, pH 9.4) solution upon 395 nm LED irradiation.

**Supplementary Figure 57.** UV−vis spectra for DPBF (10.0 μM) oxidation in the presence of Pt2**LQ**Cl2(10.0 μM) in CH3CN/H2O (1:1, pH 9.4) solution upon 395 nm LED irradiation over time.

**Supplementary Figure 58.** The yields of **1b** under the standard condition upon the irradiation of full power and half power within 6 min with **H1** as catalyst.

**Supplementary Figure 59.** The yields of **1b** under the standard condition upon the irradiation of full power and half power within 6 min with **GFe** as catalyst.

**Data Relative to Photocatalytic Reactions**

**Supplementary Figure 60.** The yield of **1b** varied with the concentration of NaOH. Reaction condition: **1a** (16.0 mM), **H1** (0.1 mM) and **GFe** (0.1 mM) in CH3CN/H2O (1:1) upon 395 nm LED (30 mW**·**cm−2) for 6 h under O2 atmosphere.

**Supplementary Figure 61.** The normalized luminescence spectra of **HG** (20.0 μM) upon the addition of ATP (total 0.2 mM) in CH3CN/H2O (1:1, pH 9.4) solution, the luminescence intensity was recorded at 465 nm and excited at 365 nm.

**Supplementary Figure 62.** The initial rate (5 min) of **1b** production under standard condition with different ATP concentrations, and the normalized luminescence intensity at 465 nm varied with ATP concentration.

**Supplementary Figure 63.** The initial yields (3 min) of **1b** with different NaPF6 concentrations under standard condition.

**Supplementary Figure 64.** The photocatalytic **1a** oxidation performed under standard condition: **HG** (20.0 μM) and **1a** (16.0 mM) in CH3CN/H2O (1:1, pH 9.4) under O2 atmosphere with the 395 nm LED (30 mW**·**cm−2) irradiation for 10.0 min and its control experiments performed under Ar or in the dark or without **HG**.

**Supplementary References**

1. Huang, H., Jing, X., Deng, J., Meng, C. & Duan, C. Enzyme-inspired coordination polymers for selective oxidization of C(sp3)−H bonds via multiphoton excitation. *J. Am. Chem. Soc.* **145**, 2170−2182 (2023).
2. Beni, A., Dei, A., Laschi, S., Rizzitano, M. & Sorace, L. Tuning the charge distribution and photoswitchable properties of cobalt-dioxolene complexes by using molecular techniques. *Chem. Eur. J.* **14**, 1804−1813 (2008).
3. Ji, G., Zhao, L., Wang, Y., Tang, Y., He, C., Liu, S. & Duan, C. A binuclear cerium-based metal−organic framework as an artificial monooxygenase for the saturated hydrocarbon aerobic oxidation with high efficiency and high selectivity. *ACS Catal.* **12**, 7821−7832 (2022).
4. Lin, Q., Mao, C., Kong, A., Bu, X., Zhao, X. & Feng, P. Porphyrinic coordination lattices with fluoropillars. *J. Mater. Chem. A* **5**, 21189−21195 (2017).
5. SMART, Data collection software (version 5.629) (Bruker AXS Inc., Madison, WI, 2003).
6. SAINT, Data reduction software (version 6.45) (Bruker AXS Inc., Madison, WI, 2003).
7. Sheldrick, G. M. SHELX97, Program for Crystal Structure Solution (University of Göttingen: Göttingen, Germany, 1997).
8. Spek, A. L. PLATON SQUEEZE: a tool for the calculation of the disordered solvent contribution to the calculated structure factors. *Acta Cryst. Sec. C* **71**, 9−18 (2015).
